# A Systematic Review evaluating the role of the 7 T MRI in Neurosurgery: Unveiling Trends in the Literature So Far after Clinical Approval in 2017.

Arosh S. Perera Molligoda Arachchige<sup>1</sup>

1. Independent Researcher

## Abstract

**Aims:** (1) To assess the impact of 7-Tesla Magnetic Resonance Imaging (7T MRI) on neurosurgery, focusing on its applications in diagnosis, treatment planning, and post-operative assessment. (2) To systematically analyze and identify patterns and trends in the existing literature related to the utilization of 7T MRI in neurosurgical contexts.

**Methods:** Systematic search of PubMed for studies published between January 1, 2017, and December 31, 2021, using MeSH terms related to 7T MRI and neurosurgery. Inclusion criteria: Studies involving patients of all ages, meta-analyses, systematic reviews, and original research. Exclusion criteria: Pre-prints, studies with insufficient data eg: case reports, letters, etc., non-English publications, and studies involving animal subjects. Data synthesis involved standardized extraction forms, and a narrative synthesis was performed.

**Results:** Identified 83 records from PubMed, screened for inclusion criteria, resulting in 48 studies included in the systematic review. Most common neurosurgical procedures using 7T MRI: endoscopic neurosurgery, resective epilepsy surgery, and deep brain stimulation surgery. Commonly treated pathologies: cerebrovascular diseases, epilepsy, pituitary adenoma, and gliomas. USA, Netherlands, and Germany had the highest absolute number of publications, but the Netherlands showed the highest research productivity per 7T MRI available. A decline in research output in 2018 followed by an increase in subsequent years. Could not conduct a meta-analysis due to insufficient studies for each pathology.

**Conclusions:** 7T MRI holds great potential in improving the characterization and understanding of various neurological and psychiatric conditions. Superiority of 7T MRI over lower field strengths demonstrated in terms of image quality, lesion detection, and tissue characterization. Applications in epilepsy, pituitary adenoma, Parkinson's disease, cerebrovascular diseases, trigeminal neuralgia, traumatic head injury, multiple sclerosis, glioma, and psychiatric disorders. Limitations include database selection, research productivity metrics, and study inclusion criteria. Findings suggest the need for accelerated global distribution of 7T MR systems and increased training for radiologists to ensure safe and effective integration into routine clinical practice.

**Keywords:** 7-Tesla; MRI; neuroimaging; neurosurgery; pathologies; procedures; trends

## 1. Introduction

In the realm of modern medicine, the field of neurosurgery stands as a testament to the remarkable progress achieved through advancements in technology and imaging. The delicate and intricate nature of the human brain necessitates tools and techniques that allow for precise diagnosis, treatment planning, and surgical intervention. Among the many innovations that have revolutionized the field, one technology has emerged as a promising game-changer: the 7-Tesla Magnetic Resonance Imaging (7T MRI) scanner, which also received US FDA approval for clinical use in 2017 [1,2,3]. The introduction of 7T MRI represents a pivotal moment in the history of neurosurgery. This remarkable imaging technology harnesses the power of ultra-high magnetic fields to produce images with unprecedented detail and resolution, far surpassing the capabilities of conventional MRI scanners [4]. By capitalizing on the inherent magnetic properties of hydrogen nuclei within the human body, 7T MRI offers both neurosurgeons and neurologists an invaluable tool to investigate deeper into the intricate structures of the brain, enabling them to make more precise assessments of pathology and formulate optimized treatment strategies [5,6].

Traditionally, neurosurgery has relied upon lower field strength MRI machines, typically operating at 1.5 or 3 Tesla. While these systems have been instrumental in guiding surgical interventions and aiding in preoperative planning, they often fall short in providing the level of detail required for complex neurosurgical cases [2,3]. The limitations of lower field strength MRI, such as reduced spatial resolution and limited contrast, have posed challenges in accurately delineating critical structures, identifying subtle abnormalities, and characterizing lesions, ultimately affecting the quality and safety of neurosurgical procedures [5,6]. The emergence of 7T MRI, with its higher magnetic field strength, has raised the bar for neuroimaging capabilities. It promises to unveil new dimensions of information that were previously concealed, shedding light on intricate anatomical details and subtle pathologies that were once elusive [5,6]. This newfound precision has the potential to redefine the landscape of neurosurgery by offering enhanced preoperative assessment and surgical guidance, ultimately leading to improved patient outcomes and reduced surgical risks.

This systematic review aims to systematically analyze and identify patterns and trends within the existing literature on the utilization of 7T MRI in neurosurgical contexts, focusing on its applications in the diagnosis, treatment planning, and post-operative assessment of various neurosurgically treated pathologies.

## 2. Methods

A systematic search of the PubMed database was conducted to identify relevant studies published between January 1, 2017, and December 31, 2021, using the following MeSH search terms: ((7 Tesla MRI) AND (neurosurgery)). Two independent reviewers performed the initial search and screening, with inclusion criteria encompassing studies involving patients of all ages (both paediatric and adults)

where 7-Tesla MRI imaging was performed and/or compared with conventional MRI imaging in the context of neurosurgery. Eligible study types included meta-analyses, systematic reviews, and original research. Exclusion criteria involved studies with insufficient data such as case reports, publications not in English, and studies of animal subjects. Data synthesis involved standardized extraction forms. Detailed results will be presented in the subsequent results section. A narrative synthesis of the findings will also be presented. In this systematic review, we focused on analyzing trends in the literature pertaining to the use of 7-Tesla MRI in neurosurgery. Our primary objective was to provide a comprehensive and descriptive overview of research conducted within the specified time frame. Given the nature of our research question and the scope of our analysis, we chose not to perform a formal risk of bias assessment for individual studies using QUADAS or Rob2 [7,8]. Our decision was based on the recognition that our aim was to capture and summarize the breadth of research in this field rather than to make judgments about the quality or internal validity of the included studies nor the determination of diagnostic accuracy. Nonetheless, we have reported key characteristics and methodological details of the studies in our analysis, including any notable limitations or methodological considerations, to provide readers with a transparent understanding of the included literature.

### **3. Results**

We initially identified a total of 83 records from the PubMed database between our defined period. We found no duplicate publications or any other reason to remove any manuscript before screening. All 83 articles were screened and out of them 31 were excluded as they did not meet our inclusion criteria. Finally, 52 reports were retrieved and 1 out of them was irrelevant to neurosurgery, and 3 were animal studies. This yielded a total of 48 studies that were included in our systematic review.

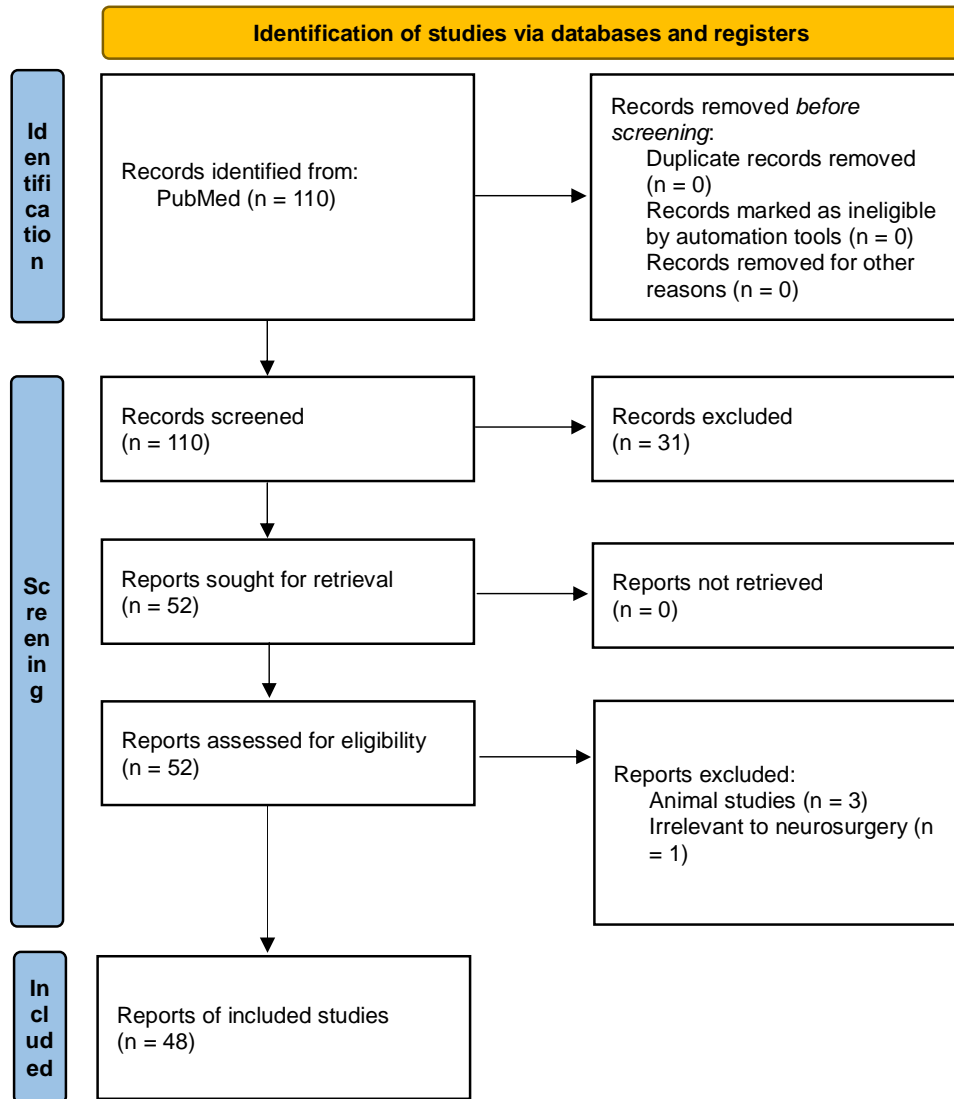

**Figure 1.** The PRISMA flowchart depicting the selection of studies for our systematic review [9].

Unfortunately, we could not conduct a meta-analysis to determine the diagnostic accuracy of the 7-T MRI for each pathology since the number of studies for each topic was deemed insufficient to derive valid conclusions.

Thus, we manually categorized the data in our database to obtain the number of publications available on PubMed for each of the neurosurgical procedures discussed in them as well as for each neurosurgically treated disease. According to our data, the most common neurosurgical procedures utilizing 7-T MRI were endoscopic neurosurgery, resective epilepsy surgery, and deep brain stimulation surgery with 5 publications (p) per each procedure, see Figure 2.

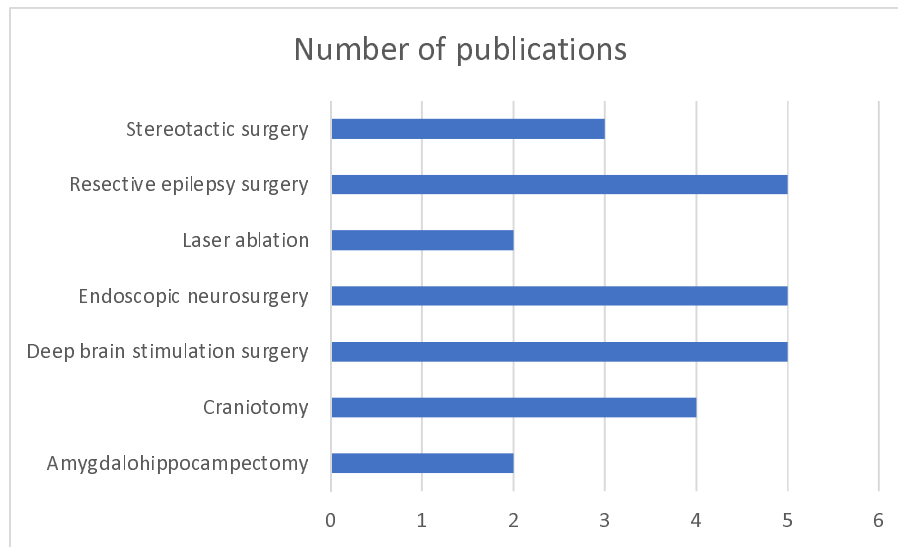

**Figure 2.** Chart showing number of 7-T publications per neurosurgical procedure.

The most commonly treated pathologies were cerebrovascular diseases (9p), followed by epilepsy (7p), pituitary adenoma (6p) and gliomas (6p). However, it should be noted that under cerebrovascular diseases, a series of diseases were considered such as amyloid angiopathy (1p), arteriovenous malformations (1p), stroke (2p), atherosclerosis (1p), intracranial aneurysms (3p), intracerebral hemorrhage (1p), see Figure 3.

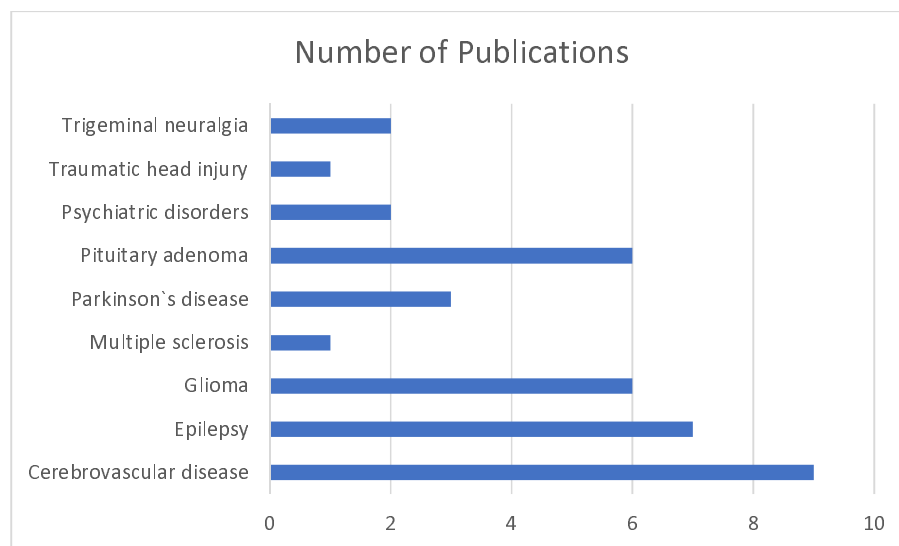

**Figure 3.** Chart showing number of 7-T publications per each neurosurgically treated pathology.

We also sorted the number of publications produced by each country. For this, only the institutional affiliation of the first author was considered. The countries with the highest absolute number of publications were the USA (15p) followed by the Netherlands (10p) and Germany (6p). However, since these values do not provide a measure of research productivity, we decided to obtain the number of publications per 7-T MRI available and concluded that the Netherlands had the highest research productivity in the present domain, see Figure 4.

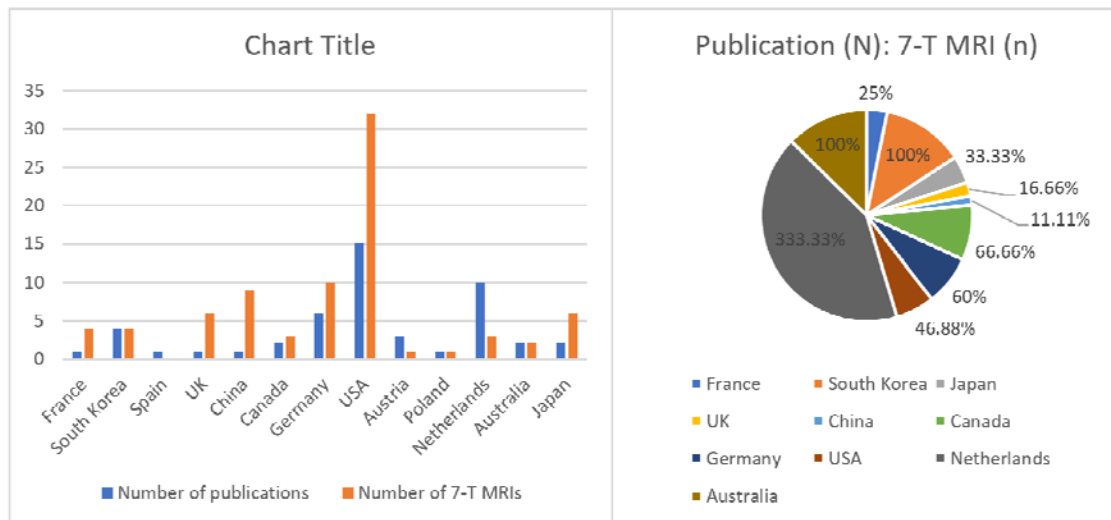

**Figure 4.** (left) Histogram showing number of 7-T publications vs 7-T MRI machines available per country. (right) The same information translated into a pie chart to denote each country's overall contribution.

We also noticed that there has been a decline in the research output in the year 2018 and 2021 before the subsequent increase observed later on, see Figure 5.

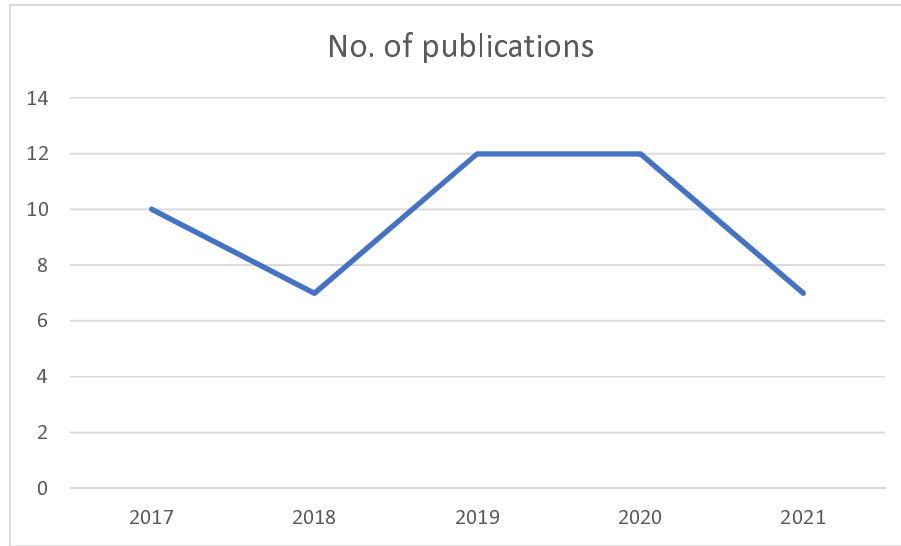

**Figure 5.** Illustration of the number of 7-T publications in each year from 2017 to 2021

We also extracted the data from the database to create a table summarizing the studies and their primary endpoints and sequences used falling under each pathology discussed, see Table 1.

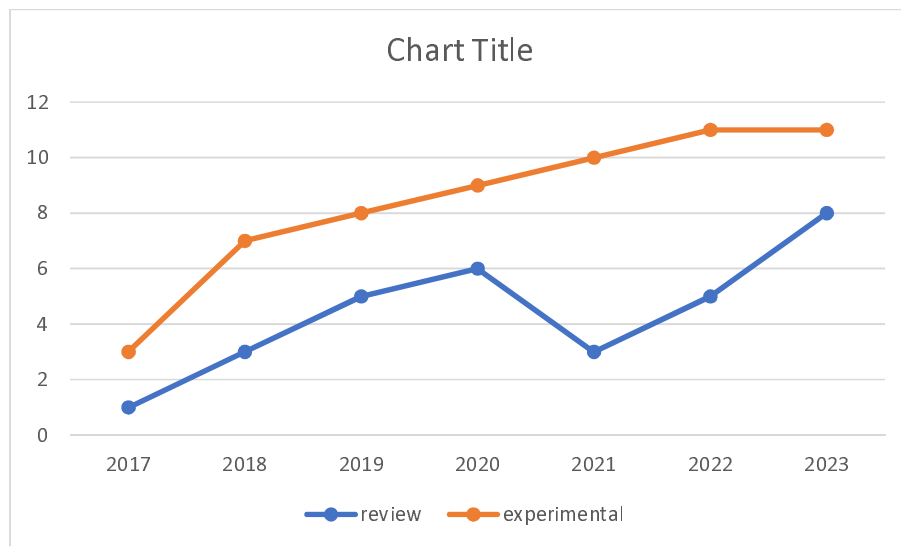

**Figure 6.** SAMPLE FIGURE !!

#### 4. Discussion

The present systematic review aimed to synthesize the findings of various studies related to the use of 7T MRI in different clinical conditions. Through the analysis of the included articles, several important observations and implications have emerged. Firstly, the use of 7T MRI has demonstrated great potential in improving the characterization and understanding of various neurological and psychiatric conditions. Studies focusing on conditions such as temporal lobe epilepsy, pituitary adenoma, unruptured intracranial aneurysms, and movement disorders have reported valuable insights

into disease mechanisms, anatomical abnormalities, and functional alterations. The high resolution and improved signal-to-noise ratio offered by 7T MRI have allowed for the detection of subtle structural changes and enhanced visualization of pathological features, leading to more accurate diagnosis and better treatment planning. Furthermore, the comparison studies included in this systematic review consistently demonstrated the superiority of 7T MRI over lower field strengths, such as 3T or 1.5T, in terms of image quality, lesion detection, and tissue characterization. The higher magnetic field strength of 7T MRI enables increased spatial resolution and improved contrast, which are crucial for identifying small lesions, delineating fine anatomical structures, and providing more precise localization of abnormalities.

#### *4.1. Epilepsy*

The utilization of high-resolution 7-T MRI in the examination of the hippocampus among Temporal Lobe Epilepsy (TLE) patients has proven to be a valuable non-invasive tool. The correlation between 7-T MRI morphological images and histopathological findings provides a crucial link, offering insights into the structural aspects of the hippocampus in TLE [10]. Overall, high-resolution, ultra-high-field MRI shows promise for detecting subtle hippocampal changes in temporal lobe epilepsy, but larger cohorts are needed to confirm its predictive value in the preoperative evaluation of TLE patients [10].

In patients with pharmaco-resistant epilepsy, the inclusion of 7T MRI in the presurgical evaluation process, especially for patients with nonlesional 3T MRI scans, demonstrates its potential to uncover crucial information that may guide treatment decisions in this challenging patient population [11]. The data indicate a significant advantage of using 7T MRI with post-processing techniques for identifying subtle focal cortical dysplasia (FCD) lesions in patients with pharmaco-resistant epilepsy and nonlesional 3T MRI scans. This highlights the potential of 7T imaging as a valuable tool in improving the detection of FCD lesions in challenging cases [11].

The introduction of hippocampal subfield-specific tractography has enabled the quantification of connectivity within the subfields in MRI-negative patients and identified abnormal connectivity patterns. This information holds promise in refining the understanding of seizure focus hypothesis, thereby aiding in the formulation of more informed surgical strategies [12]. The findings indicate that distinct connectivity patterns exist among hippocampal subfields in different types of epilepsy. These results hold potential significance for informing hypotheses regarding seizure focus and guiding surgical interventions, particularly in patients with MRI-negative findings. The study suggests that employing high-resolution diffusion MRI-based tractography of hippocampal subfields can reveal subtle abnormalities in patients with otherwise normal-appearing MRI scans, offering a valuable diagnostic tool in such cases [12].



7T MRI has been compared with conventional field strengths in detecting focal cortical dysplasias (FCDs). Findings suggest that the use of 7T MRI in clinical practice may significantly enhance the detection rates of FCDs, making it a valuable tool in identifying candidates for epilepsy surgery who might have otherwise been overlooked [13]. Seven-tesla MRI enhances the identification of subtle focal cortical dysplasia and mild cortical development malformations in individuals with intractable epilepsy. This improvement in detection may play a role in identifying suitable candidates for surgery and facilitating the complete resection of epileptogenic lesions, potentially leading to postoperative freedom from seizures [13].

The comparative analysis of hippocampal internal architecture between 3 and 7 Tesla MRI in TLE patients provided valuable insights into the resolution capabilities of these imaging techniques and highlighted the potential superiority of 7T MRI in capturing finer details of the hippocampal structure, contributing to a more comprehensive understanding of TLE [14]. Enhancement of hippocampal internal architecture (HIA) visualization is achievable with 7T MRI. Notably, HIA asymmetry serves as a substantial predictor for the laterality of seizure onset in temporal lobe epilepsy (TLE) patients, demonstrating comparable predictive efficacy to hippocampal volume asymmetry. Nevertheless, the utilization of 7T MRI for HIA asymmetry does not provide additional value in determining epilepsy lateralization, and it does not predict surgical outcomes [14].

The inclusion of a quantitative assessment of surgical outcomes in patients scanned at 7T MRI, whose lesions were undetectable at conventional field strengths, further emphasizes the clinical impact of 7T imaging elucidating the practical implications of employing 7T MRI in improving surgical outcomes for patients with initially elusive lesions [15]. Among the 16 patients studied, 7 exhibited clear epileptogenic potential on 7T imaging, while 9 had findings of a less definite nature. Remarkably, 15 out of 16 patients achieved Engel I, II, or III outcomes, denoting substantial improvement. Notably, those with definite lesions on 7T imaging had a higher rate of achieving Engel I surgical outcomes (57.1%) compared to those with less definite lesion status (33.3%). This suggests that patients initially diagnosed as "MRI Negative" on lower field strength scans but with clear radiological findings on 7T, corresponding to the suspected seizure onset zone (sSOZ), may benefit significantly from surgical intervention [15].

The data presented in many studies strongly suggest that the use of 7T MRI may indeed lead to increased sensitivity, thereby offering a more comprehensive diagnostic approach in the management of epilepsy [16]. The use of Ultra-High Field (UHF) MRI demonstrates increased sensitivity in detecting epileptogenic lesions, albeit with variability, indicating its potential for clinical applications. However, it remains to be determined whether this heightened sensitivity translates into improved seizure outcomes following surgical treatment. Prospective studies involving larger cohorts of epilepsy patients, consistent scan and sequence protocols, and advancements in post-processing

technology are crucial for further exploration. Beyond technical enhancements, establishing a better correlation between imaging features and clinical semiology, histopathology, and overall clinical outcomes is equally important for the continued refinement of UHF MRI in epilepsy diagnosis and treatment [16].

#### *4.2. Pituitary Adenoma*

Our investigation into the utility of 7T MRI in predicting the tumor consistency of pituitary adenomas reveals promising insights. The high-resolution imaging capabilities of 7T MRI contribute to a more accurate characterization of the internal composition of these tumors, providing valuable information for preoperative planning and predicting surgical outcomes [17]. The enhanced signal and contrast capabilities of 7T MRI offer valuable insights into the consistency and physiology of pituitary tumors preoperatively. Employing a granular, voxel-based analysis maximizes the potential of 7T imaging resolution and represents a valuable method for predicting the consistency of pituitary adenomas [17].

7T diffusion-weighted MRI (DWI) has been successfully applied for probabilistic tractography of the optic tracts and radiations in patients with pituitary macroadenomas. The correlation between imaging findings and neuro-ophthalmological results offers a comprehensive understanding of microstructural damage. This approach contributes to the objective evaluation of damage to the anterior and posterior visual pathways, enhancing our ability to assess the impact of pituitary adenomas on visual function [18]. Quantifying secondary neuronal damage from adenomas through imaging strongly correlates with neuro-ophthalmological findings. The diffusion characteristics facilitated by ultra-high-field Diffusion-Weighted Imaging (DWI) enable preoperative characterization of visual pathway damage in patients experiencing chiasmatic compression. This approach holds the potential to inform prognosis regarding the recoverability of vision in these individuals [18].

A study also delved into the retinotopic organization of the primary visual cortex (V1) using ultra-high-field 7T MRI. By correlating visual defects with cortical thinning in V1, researchers characterized the consequences of pituitary adenomas on the posterior visual system. This exploration provides valuable insights into the anatomical basis of visual impairments associated with these tumors [19]. All 8 patients showed significant positive correlations between V1 thickness and visual defect. These findings provide retinotopic maps of localized V1 cortical neurodegeneration spatially corresponding to impairments in the visual field. These results further characterize changes in the posterior visual pathway associated with chiasmatic compression, and may prove useful in the neuroophthalmological workup for patients with pituitary macroadenoma [19].

The initial experience with ultra-high-field 7T MRI in patients with suspected Cushing's disease and negative or equivocal imaging at conventional field strengths represents a critical aspect in detecting

subtle abnormalities may offer a valuable diagnostic tool in cases where conventional imaging falls short, contributing to improved diagnostic accuracy and patient management [20]. The study revealed that 7T MRI facilitated the identification of previously unnoticed focal pituitary hypoenhancement in 90% (9/10) of patients. Remarkably, 7 out of these 9 cases corresponded histologically to corticotroph adenomas. These initial findings indicate a significant adjunctive role for ultra-high field MR imaging in the noninvasive clinical assessment of suspected Cushing's disease [20].

7T DWI has been described as a novel method for measuring the consistency of pituitary adenomas. The high spatial resolution and sensitivity of 7T MRI enable a more detailed assessment of the internal architecture of these tumors. This novel approach holds potential for refining our understanding of tumor characteristics and guiding treatment decisions [21]. The findings from the study indicate that a high-resolution Apparent Diffusion Coefficient (ADC) of pituitary adenomas serves as a sensitive measure of tumor consistency. Utilizing 7T Diffusion-Weighted Imaging (DWI) may have clinical significance in the preoperative assessment and surgical management of patients with pituitary macroadenomas [21].

The efficacy of 7T MRI in identifying radiological markers associated with endocrine function in pituitary adenomas has been also explored. The high-field strength of 7T MRI allows for improved visualization and characterization of subtle structural changes that may be indicative of endocrine dysfunction. This contributes to a more comprehensive assessment of pituitary adenomas and their impact on hormonal regulation [22]. Radiological characterization of pituitary adenomas and the adjacent native pituitary tissue stands to benefit from the application of 7T MRI. The Corrected T2 Signal Intensity (SI) of the tumor emerges as a sensitive predictor of hormonal secretion, offering utility in the diagnostic workup for pituitary adenoma. The use of 7T MRI proves valuable in identifying markers of endocrine function in patients with pituitary adenomas. The results of the study suggest that hormone-secreting tumors exhibit higher T2-weighted SI, and tumors associated with preoperative hypopituitarism display greater stalk curvature angles [22].

#### *4.3. Parkinson`s disease*

A study aimed to validate the clinical application accuracy of the 7T-ML method by comparing it with the identification of the Subthalamic Nucleus (STN) based on intraoperative microelectrode recordings. The comparison highlights the reliability and precision of the 7T-ML method, suggesting its potential as a non-invasive tool for STN localization in Parkinson's disease patients undergoing deep brain stimulation (DBS) [23]. The 7T-ML method demonstrates high consistency with microelectrode-recordings data, offering a reliable and accurate patient-specific prediction for targeting the Subthalamic Nucleus (STN) [23].

Next, the integration of ultra-high field template data into the clinical workflow represents a significant advancement in deep brain stimulation (DBS) surgical planning. By assisting with target selection, 7T MRI provides a more detailed and accurate representation of the brain anatomy, potentially improving the precision and efficacy of DBS procedures in Parkinson's disease patients [24]. This work outlined a workflow for integrating high-resolution in vivo ultra-high field templates into the surgical navigation system to aid in Deep Brain Stimulation (DBS) planning. Importantly, this method does not impose any additional cost or time on the patient. Future efforts will focus on prospectively evaluating various templates and assessing their impact on target selection [24].

Another study delved into the in vivo measurement of hippocampal subfields using ultra-high field 7-Tesla MRI. The exploration of whether these measures predict episodic memory impairment in Parkinson's disease during life is a novel approach. The findings provided insights into the structural changes within the hippocampus, contributing to our understanding of cognitive deficits in Parkinson's disease and potentially offering markers for early diagnosis and intervention [25]. The study identified that the thickness of the hippocampal CA1-SP subfield, estimated from 7-Tesla MRI scans, emerged as the most robust predictor of episodic memory impairment. This predictive capability persisted even when accounting for potential confounding clinical measures. These findings suggest that ultra-high field imaging holds promise as a sensitive tool for detecting alterations in hippocampal subfields, offering insights into the neuroanatomical basis of episodic memory impairments in individuals with PD [25].

#### *4.4. Cerebrovascular diseases*

A prospective evaluation of the utility of non-contrast-enhanced 7-Tesla MRA for delineating unruptured intracranial aneurysms (UIAs) provided high-resolution imaging, potentially enhancing the detection and characterization of UIAs, thereby contributing to improved diagnostic capabilities in the context of cerebrovascular diseases [26]. The study showcases the outstanding delineation of Unruptured Intracranial Aneurysms (UIAs) through 7-Tesla Magnetic Resonance Angiography (MRA) within a clinical setting, presenting a comparability to the gold standard, Digital Subtraction Angiography (DSA). The combined use of 7-T non-enhanced Magnetization-Prepared Rapid Gradient Echo (MPRAGE) and Time-of-Flight (TOF) MRA for evaluating untreated UIAs emerges as a promising clinical application of ultra-high-field MRA [26].

The potential of OEF maps generated by magnetic resonance quantitative susceptibility mapping (QSM) at 7 Tesla in detecting changes in oxygen extraction fraction (OEF) has also been investigated. The comparison with PET results establishes the capability of 7T MRI to non-invasively monitor OEF alterations, offering a valuable alternative to traditional imaging modalities [27]. In patients with unilateral steno-occlusive internal carotid artery/middle cerebral artery lesions, OEF ratios on 7-Tesla

Quantitative Susceptibility Mapping (QSM) images demonstrated a strong correlation with those on Positron Emission Tomography (PET) images. This suggests that noninvasive OEF measurement by MRI has the potential to serve as a substitute for PET in assessing oxygen extraction fraction [27].

A study also explored the use of whole-brain magnetic resonance angiography (MRA) at 7T for the non-invasive detection of impaired cerebrovascular reactivity (CVR) in patients with chronic cerebral ischemia. By highlighting leptomeningeal collaterals (LMCs), 7T MRI emerges as a promising tool for assessing cerebrovascular function in a comprehensive manner [28]. The development of LMCs on whole-brain MRA at 7T can non-invasively detect reduced CVR with a high sensitivity/specificity in patients with unilateral cervical stenosis [28].

The radiofrequency (RF)-induced tissue heating around aneurysm clips during a 7T head MR examination was also evaluated and aimed to determine the decoupling distance between multiple implanted clips, ensuring the safety and feasibility of 7T MRI in patients with aneurysm clips [29]. In a 7T ultra-high field MRI setting, safe scanning conditions regarding Radiofrequency (RF)-induced heating can be implemented for single or decoupled aneurysm clips. However, more research is required for cases involving multiple aneurysm clips separated by less than 35 mm to ensure safety in this specific configuration [29].

Delineation of wall weak areas in Intracranial Aneurysms was performed using 7T MRI to identify weak areas prone to rupture. This approach provided valuable insights into the structural characteristics of aneurysm walls, potentially contributing to risk stratification and personalized treatment strategies [30]. In most cases, there was an observed hyperintense rim effect along the vessel wall. Notably, focal irregularities within this rim demonstrated elevated values of mean wall shear stress and vorticity, as analyzed by Computational Fluid Dynamics (CFD). These findings suggest that there are alterations in blood flow within these specific areas in Intracranial Aneurysms (IAs) [30].

The occurrence of a striped occipital cortex and intragyral hemorrhage, previously detected on ultra-high-field 7-tesla magnetic resonance imaging in hereditary cerebral amyloid angiopathy (CAA) was also investigated. The study aimed to determine whether these markers are also present in sporadic CAA (sCAA) or non-sCAA intracerebral hemorrhage (ICH), contributing to the understanding of imaging markers in different forms of CAA [31]. While a striped occipital cortex is uncommon in superficial cortical siderosis (sCAA), approximately 12% of patients with sCAA exhibit intragyral hemorrhages. These intragyral hemorrhages appear to be associated with advanced disease, and their

absence in patients with non-superficial cortical siderosis intracerebral hemorrhages (non-sCAA-ICH) may suggest a level of specificity for cerebral amyloid angiopathy (CAA) [31].

Next, a study compared cerebral cavernous malformations (CCMs)-associated cerebral venous angioarchitecture between sporadic and familial cases using 7T MRI. This investigation provided insights into the vascular alterations associated with CCMs, potentially aiding in the differentiation and characterization of familial and sporadic cases [32]. The SWI results of the venous angioarchitecture of multiple CCMs correlate with sporadic or familial disease. These results are consistent with the theory that venous anomalies are causative for the sporadic form of multiple CCMs [32].

A comparison of 3T and 7T MRI in visualizing intracranial arterial vessel wall and vessel wall lesions found potential benefits of 7T MRI in providing enhanced resolution and detailed characterization of vessel wall abnormalities in cerebrovascular diseases [33]. Even with considerable variability in detected lesions at both field strengths, 7-Tesla MRI has the highest potential for identifying the overall burden of intracranial vessel wall lesions [33].

The presence and extent of contrast agent leakage distant from the hematoma was found as a marker of blood-brain barrier (BBB) disruption in patients with spontaneous intracerebral hemorrhage (ICH). The use of 7T MRI allows for a detailed examination of BBB integrity, providing valuable information on the extent of vascular damage in the surrounding brain tissue [34]. This study shows that contrast leakage distant from the hematoma is common in days to weeks after spontaneous ICH. It is located predominantly cortical and related to lobar CMBs and therefore possibly to cerebral amyloid angiopathy [34].

#### *4.5. Trigeminal neuralgia*

7 Tesla MRI was employed to investigate the central causal mechanisms of trigeminal neuralgia (TN) and the surrounding brain structure. By comparing healthy controls with patients suffering from TN, researchers aimed to identify structural and functional alterations in the trigeminal nerve and associated brain regions. The high resolution and sensitivity of 7T MRI enable a detailed examination, shedding light on potential biomarkers and contributing to our understanding of the underlying mechanisms of TN [35]. Results suggest that the cACC, PCC but not the rACC are associated with central pain mechanisms in TN [35].

Another study explored the use of 7T MRI for investigating diffusion tensor imaging (DTI) parameters and assessing the feasibility of DTI criteria for diagnosing trigeminal neuralgia. By examining the microstructural integrity of the trigeminal nerve, the research aimed to identify specific DTI parameters that may serve as diagnostic indicators for TN. The high-field strength of 7T MRI

enhanced the accuracy and sensitivity of DTI measurements, providing valuable information for the development of reliable diagnostic criteria for trigeminal neuralgia [36]. The heightened signal-to-noise ratio offered by 7 Tesla MRI is expected to be advantageous in enhancing spatial resolution for the detection of microstructure changes in trigeminal nerves among patients with Trigeminal Neuralgia (TN) [36].

#### *4.6. Traumatic head injury*

A study examined the potential prognostic advantages of utilizing 7 Tesla susceptibility-weighted imaging (SWI) for traumatic cerebral microbleeds (TMBs) in comparison to 3 Tesla SWI. This evaluation aimed to forecast the immediate clinical condition and subjective impairments, encompassing health-related quality of life (HRQOL), following a closed head injury (CHI). The number of traumatic cerebral microbleeds showed a substantial association with indicators of the acute clinical state and chronic neurobehavioral parameters after closed head injury, but there was no additional advantage of 7 T MRI. These preliminary findings warrant a larger prospective study for the future [37]. The number of TMBs showed a substantial association with indicators of the acute clinical state and chronic neurobehavioral parameters after CHI, but there was no additional advantage of 7 T MRI. These preliminary findings warrant a larger prospective study for the future [37].

#### *4.7. Multiple sclerosis*

Fluid-attenuated inversion recovery (FLAIR) imaging at a 3 Tesla (T) field strength is recognized as the most sensitive method for identifying white matter lesions in multiple sclerosis. Although 7T FLAIR effectively detects cortical lesions, it has not been fully optimized for visualizing white matter lesions, thus limiting its use in delineating lesions in quantitative magnetic resonance imaging (MRI) studies of normal appearing white matter in multiple sclerosis. As a result, a team assessed the sensitivity of 7T magnetization-transfer-weighted (MTw) images in detecting white matter lesions in comparison to 3T FLAIR. The findings indicate that 7T MTw sequences successfully identified a majority of white matter lesions detected by FLAIR at 3T. This implies that 7T-MTw imaging serves as a robust alternative for detecting demyelinating lesions alongside 3T FLAIR. Subsequent studies should explore and compare the roles of optimized 7T-FLAIR and 7T-MTw imaging [38]. Seven-Tesla Magnetization Transfer-weighted (MTw) sequences successfully detected the majority of white matter lesions that were identified by Fluid-Attenuated Inversion Recovery (FLAIR) at 3 Tesla. This indicates that 7T-MTw imaging can serve as a robust alternative for detecting demyelinating lesions in



addition to 3T-FLAIR. Future studies should focus on comparing the roles of optimized 7T-FLAIR and 7T-MTw imaging for a more comprehensive understanding of their respective contributions [38].

#### *4.8. Glioma*

Ultra-high-field magnetic resonance imaging (MRI) of the brain is an appealing option for image guidance during neurosurgery due to its superior tissue contrast and detailed vessel visualization. However, the susceptibility of high-field MRI to distortion artifacts poses a potential challenge to image guidance accuracy. In this study, we specifically examine intra- and extracranial distortions in 7-T MRI scans. Upon inspection of magnetization-prepared T1-weighted 7-T MRI cranial images, no discernible intracranial distortions were observed. However, noteworthy extracranial shifts were identified. These shifts introduce a level of unreliability in 7-T images when used for patient-to-image registration. To address this issue, researchers recommend conducting patient-to-image registration on a standard imaging modality, such as a routine computed tomography scan or a 3-T magnetic resonance image. Subsequently, the 7-T MRI can be fused with the routine image on the image guidance machine. This proposed approach is advised until a resolution is achieved for the observed extracranial shifts in 7-T MRI scans [39]. Magnetization-prepared T1-weighted 7-Tesla MRI cranial images exhibit no visible intracranial distortions but significant extracranial shifts. These shifts make patient-to-image registration on 7-T images unreliable. As a solution, we recommend conducting patient-to-image registration on a routine image (such as computed tomography or 3-Tesla magnetic resonance) and then fusing the 7-T magnetic resonance image with the routine image on the image guidance machine until this issue is addressed [39].

#### *4.9. Psychiatric disorders*

A team explored the potential for individuals to acquire the skill of dynamically controlling the activity of the dorsolateral prefrontal cortex (DLPFC). The DLPFC is recognized for its significance in working memory function and its association with various psychiatric disorders. This study also sought to delve into the learnability of such dynamic control, which may have implications for our understanding of cognitive processes and mental health conditions [40]. These findings offer an initial indication that individuals may have the capacity to learn to dynamically down-regulate physiological activity in the Dorsolateral Prefrontal Cortex (DLPFC). This has potential implications for psychiatric disorders in which the DLPFC plays a significant role [40].

Another study utilized a combination of high-resolution and quantitative magnetic resonance (MR) imaging, employing both supervised and unsupervised computational techniques. This approach enabled the acquisition of robust sub-millimeter measurements of the locus coeruleus (LC) in vivo.



Additionally, the study investigated the correlation of these measurements with prevalent psychopathological conditions. The implications of this work extend broadly, as it holds the potential to impact various neurological and psychiatric disorders known for their association with anticipated LC dysfunction [41]. This study combined high-resolution and quantitative MR with a mixture of supervised and unsupervised computational techniques to provide robust, sub-millimeter measurements of the LC in vivo, which were additionally related to common psychopathology. This work has wide-reaching applications for a range of neurological and psychiatric disorders characterized by expected LC dysfunction [41].

## **5. Limitations of our analysis**

It is essential to highlight the limitations of our study. The first limitation is that in order to make the analysis feasible and to ensure the credibility of the studies we have only used the PubMed database since we observed that manually searching Embase there was no additional significant gain in terms of the number of studies.

Furthermore, while we have evaluated the research productivity using the ratio of publications per resource, it's important to keep in mind that research productivity should not be evaluated solely based on a single metric like this ratio. Productivity in research is multifaceted and can be influenced by various factors, including the quality and impact of publications, the significance of the research findings, collaborations, funding, and more. So, we acknowledge that this ratio should have been used in conjunction with other relevant metrics and qualitative assessments to provide a more comprehensive evaluation of research productivity in your specific context.

Next, with regard to Spain that showed 1 publication and no 7T MRI facility, we hypothesize that this was probably because they might have conducted the study in a facility outside Spain. So, due to this issue (a value of 0 in the denominator giving an infinitely high result) Austria, Poland, and Spain were removed for the sake of obtaining a valid dataset.

Another limitation of our study was that if an author affiliated to the Neurosurgery department was involved in the manuscript, the study was included even though a procedure was not specified in the article.

In addition, the reduction of number of publications in 2021 could have been due to the fact that some records might have been added to the database after our search in January 2022.

Lastly, though we retrieved a total of 48 studies into our database, only 31 out of those have been referenced in this review in Table 1 since they were relevant to a specific pathology while the

remaining have only been denoted in the figures (were used only for analysis and generation of the data) [41-58].

## 6. Conclusion

The findings open avenues for further exploration and integration of 7T imaging into routine clinical practice, promising improved patient outcomes and refined surgical interventions. However, this will be possible only if the distribution of 7-T MR systems is accelerated worldwide and given that radiologists receive enough training regarding safety measures, feasibility, and other challenges.

Acknowledgement: The LLM ChatGPT has been used for paraphrasing [59-67].

**Conflicts of Interest:** The author declares that the research was conducted in the absence of any commercial or financial relationships that could be construed as a potential conflict of interest.

**Table 1.** Summary of studies included in the review falling under each neurosurgically treated pathology, first author, year of publication, endpoints, and 7-T MRI protocols applied.

| Pathology | Study                        | Endpoints                                                                                                                           | 7-T MRI sequences applied                                                                                                                                                                                                                                                                                                                                     |
|-----------|------------------------------|-------------------------------------------------------------------------------------------------------------------------------------|---------------------------------------------------------------------------------------------------------------------------------------------------------------------------------------------------------------------------------------------------------------------------------------------------------------------------------------------------------------|
| Epilepsy  | Stefanits et al. (2017) [10] | To correlate noninvasive, high-resolution, morphological 7-T MRI of the hippocampus in TLE patients with histopathological findings | T2-weighted 2D fast spin echo (FSE) sequence, obtained in paracoronal, hippocampal plane perpendicular to the central sulcus (matrix, 688x688; FOV, 230 x 172.5; image resolution, 0.33 x 0.33 x 1.5 mm; slices, 25; parallel imaging, 2; repetition time (TR), 4500 milliseconds; echo time (TE), 81 milliseconds) with an acquisition time of 8.48 minutes. |
|           | Wang et al. (2020) [11]      | To assess the clinical value of in vivo structural 7T MRI and its post-processing in patients with                                  | A standard epilepsy protocol was used with the following sequences on a 7T MRI scanner (Magnetom, Siemens, Erlangen, Germany) with a head-only                                                                                                                                                                                                                |

|  |                                   |                                                                                                                                                                                                                                                                                       |                                                                                                                                                                                                                                                                                                                                                                                                                                                                                                                                                                                                                                                                                                                                                                                                                                                                                                                                                                                                                                                                                                                    |
|--|-----------------------------------|---------------------------------------------------------------------------------------------------------------------------------------------------------------------------------------------------------------------------------------------------------------------------------------|--------------------------------------------------------------------------------------------------------------------------------------------------------------------------------------------------------------------------------------------------------------------------------------------------------------------------------------------------------------------------------------------------------------------------------------------------------------------------------------------------------------------------------------------------------------------------------------------------------------------------------------------------------------------------------------------------------------------------------------------------------------------------------------------------------------------------------------------------------------------------------------------------------------------------------------------------------------------------------------------------------------------------------------------------------------------------------------------------------------------|
|  |                                   | <p>pharmacoresistant epilepsy who underwent presurgical evaluation and had a nonlesional 3T MRI.</p>                                                                                                                                                                                  | <p>circularly polarized transmit and 32-channel phased array receive coil (Nova Medical, Wilmington, MA): 3D T1-MP2RAGE: sagittal acquisition, TR/TE = 6000/3 ms, TI1/TI2 = 700/2700 ms, flip angle 1/flip angle 2 = 4/5°, 0.75 mm isotropic-voxel resolution, 208 slices, total acquisition time (TA) = 9 min 32 sec; 2D T2*-GRE (Spoiled-Gradient Echo): axial and oblique coronal acquisition, TR/TE = 2290/17.8 ms, flip angle = 23°, in-plane resolution = 0.38×0.38 mm<sup>2</sup>, slice thickness = 1.5 mm, 60 slices, no gap, TA = 9 min 50 sec; 2D FLAIR: axial and oblique coronal acquisition, TR/TE = 9000/124 ms, TI = 2600 ms, in-plane resolution = 0.75×0.75 mm<sup>2</sup>, slice thickness = 2 mm, 45 slices, 30 % gap, TA = 3 min 2 sec; 3D SWI (susceptibility weighted imaging, included only for selected cases such as vascular malformation): TR/TE = 23/15 ms, flip angle = 20°, voxel size = 0.49×0.49×0.8 mm<sup>3</sup>, 144 slices, TA = 8 min 16 sec. Two dielectric calcium titanate pads with passive B1 shimming were used to improve the signal loss in the temporal lobes.</p> |
|  | <p>Rutland et al. (2018) [12]</p> | <p>To perform hippocampal subfield-specific tractography and quantify connectivity of the subfields in MRI-negative patients. Abnormal connectivity of the hippocampal subfields may help inform seizure focus hypothesis and provide information to guide surgical intervention.</p> | <p>Participants were scanned under an Institutional Review Board-approved protocol using a 7T whole body scanner. A SC72CD gradient coil was used (G<sub>max</sub> = 70 mT/m, max slew rate = 200T/m/s), with a single channel transmit and 32 channel receive head coil. The MRI scan included a T1-weighted MP2RAGE sequence: TR = 6000 ms, TE = 3.62 ms, flip angle = 5°, field of view = 240 × 320 mm<sup>2</sup>, slices = 240, 0.7 mm<sup>3</sup> isotropic resolution, scan time = 7:26 min. A coronal-oblique T2-weighted turbo spin echo (T2TSE) sequence was included: TR = 6900 ms, TE = 69 ms, flip angle = 1500, field of view = 202 × 202 mm<sup>2</sup>, in-plane resolution 0.4 × 0.4 mm<sup>2</sup>, slice thickness = 2 mm, slices = 40, time = 6:14 min. A high-angular-resolved diffusion-weighted imaging (HARDI) dMRI sequence was also performed with whole-brain coverage: b = 1200 s/mm<sup>2</sup>, TR = 7200 ms, TE = 67.6 ms, 1.05mm</p>                                                                                                                                               |

|                   |                             |                                                                                                                                                                                                                                    |                                                                                                                                                                                                                                                                                                                                                                                                                                                                                                                                                                          |
|-------------------|-----------------------------|------------------------------------------------------------------------------------------------------------------------------------------------------------------------------------------------------------------------------------|--------------------------------------------------------------------------------------------------------------------------------------------------------------------------------------------------------------------------------------------------------------------------------------------------------------------------------------------------------------------------------------------------------------------------------------------------------------------------------------------------------------------------------------------------------------------------|
|                   |                             |                                                                                                                                                                                                                                    | isotropic resolution, in-plane acceleration R = 3 (GRAPPA), reversed phase encoding in the AP and PA direction for paired acquisition in 68 directions, with a total acquisition time of 20 minutes.                                                                                                                                                                                                                                                                                                                                                                     |
|                   | Veersema et al. (2017) [13] | To determine whether the use of 7T MRI in clinical practice leads to higher detection rates of focal cortical dysplasias in possible candidates for epilepsy surgery.                                                              | Available as supplement at : <a href="https://drive.google.com/file/d/1hfwvobw3J18cuCuL4s2J7pORs_v72ji5/view?usp=sharing">https://drive.google.com/file/d/1hfwvobw3J18cuCuL4s2J7pORs_v72ji5/view?usp=sharing</a>                                                                                                                                                                                                                                                                                                                                                         |
|                   | Zhang et al. (2019) [14]    | To compare the hippocampal internal architecture (HIA) between 3 and 7 Tesla (T) magnetic resonance imaging (MRI) in patients with temporal lobe epilepsy (TLE).                                                                   | All patients underwent MRI scans with a 3 T scanner and a 7 T scanner. Thirty-two channel head coils were used with both scanners. For the assessment of HIA, we collected T2-weighted images (T2WI) in the coronal plane located perpendicular to the long axis of the hippocampus ( 7 T T2WI-turbo spin echo (TSE): TR =9640 ms, TE =72 ms, resolution 0.3×0.3×2.0 mm, flip angle 60°,TA 11min26 s). 7 T T1WI 3Dmagnetization prepared rapid acquisition gradient echo (3D-MPRAGE): TR =2200 ms, TE =2.98 ms, resolution 0.7×0.7×0.7 mm, flip angle 8°, TA 10min16 s). |
|                   | Sharma et al. (2021) [15]   | To quantitatively assess surgical outcomes in epilepsy patients who underwent scanning at 7T MRI whose lesions were undetectable at conventional field strengths (1.5T/3T).                                                        | Patients underwent 1.5T or 3T MRI scans at the time of enrollment based on the scanning protocol of the clinical or referring site.                                                                                                                                                                                                                                                                                                                                                                                                                                      |
|                   | Lanen et al. (2021) [16]    | To assess whether 7 T MRI increases the sensitivity to detect epileptogenic lesions.                                                                                                                                               | N/A (systematic review)                                                                                                                                                                                                                                                                                                                                                                                                                                                                                                                                                  |
| Pituitary adenoma | Yao et al. (2020) [17]      | To examine the utility of 7T MRI in predicting the tumor consistency of pituitary adenomas.                                                                                                                                        | High-resolution 7T TSE(0.4X0.4X2mm), MP2-RAGE (0.75 mm isotropic) and TOF (0.26 × 0.26 × 0.4 mm) acquisitions on all patients.                                                                                                                                                                                                                                                                                                                                                                                                                                           |
|                   | Rutland et al. (2019) [18]  | To investigate microstructural damage caused by pituitary macroadenomas by performing probabilistic tractography of the optic tracts and radiations using 7-T diffusion-weighted MRI (DWI). These imaging findings were correlated | Participants were scanned under an Institutional Review Board-approved protocol using a 7T whole body scanner. A SC72CD gradient coil was used (Gmax = 70 mT/m, max slew rate = 200T/m/s), with a single channel transmit and 32-channel receive head coil. Scanning included a T1-weighted MP2RAGE sequence with the following parameters: TE(ms) = 5.1, TR(ms) = 6000, TI(ms) =                                                                                                                                                                                        |

|  |                                   |                                                                                                                                                                                                                                                                 |                                                                                                                                                                                                                                                                                                                                                                                                                                                                                                                                                                                                                                                                                                                                                                                                                                                                                                                                                                                                                                                                                                                                                                                                                                                                                                                      |
|--|-----------------------------------|-----------------------------------------------------------------------------------------------------------------------------------------------------------------------------------------------------------------------------------------------------------------|----------------------------------------------------------------------------------------------------------------------------------------------------------------------------------------------------------------------------------------------------------------------------------------------------------------------------------------------------------------------------------------------------------------------------------------------------------------------------------------------------------------------------------------------------------------------------------------------------------------------------------------------------------------------------------------------------------------------------------------------------------------------------------------------------------------------------------------------------------------------------------------------------------------------------------------------------------------------------------------------------------------------------------------------------------------------------------------------------------------------------------------------------------------------------------------------------------------------------------------------------------------------------------------------------------------------|
|  |                                   | <p>with neuro-ophthalmological results to assess the utility of ultra-high-field MRI for objective evaluation of damage to the anterior and posterior visual pathways.</p>                                                                                      | <p>1050(3000), flip angle(FA) = 5°(4°), field of view(FOV) = 240 x 320-mm<sup>2</sup>, slices = 240, resolution = 0.7-mm<sup>3</sup> isotropic, scan time (min) = 7:26. Quantitative T1-maps were derived from the MP2RAGE sequence. A coronal-oblique T2-weighted turbo spin echo (T2-TSE) (TE = 69, TR = 6900, FA = 150°, FOV = 202 x 202mm<sup>2</sup>, in-plane resolution 0.4 x 0.4-mm<sup>2</sup>, slice thickness = 2 mm, slices = 40, time = 6:14),and high-angular-resolved diffusion-weighted imaging (HARDI) dMRI (b = 1200 mm<sup>2</sup>/sec, TE = 67.6, TR = 7200, resolution = 1.05 mm isotropic, in-plane acceleration R = 3(GRAPPA), reversed phase encoding in AP and PA directions for paired acquisition in 68 directions, total acquisition time = 20) sequences were acquired.</p>                                                                                                                                                                                                                                                                                                                                                                                                                                                                                                             |
|  | <p>Rutland et al. (2020) [19]</p> | <p>To leverage ultrahigh field 7-T MRI to study the retinotopic organization of the primary visual cortex (V1) and correlate visual defects with cortical thinning in V1 to characterize consequences of pituitary adenomas on the posterior visual system.</p> | <p>Participants were scanned using a 7T whole-body scanner (Magnetom, Siemens Healthineers). A SC72CD gradient coil was used (G<sub>max</sub> = 70 mT/m, maximum slew rate = 200 tesla/m/sec), with a single-channel transmit and 32-channel receive head coil (Nova Medical). Scanning included a T1-weighted MP2RAGE sequence with the following parameters: TE 3.62 msec, TR 6000 msec, TI 1050 msec (2nd pulse 3000 msec), flip angle (FA) 5° (2nd pulse 4°), field of view (FOV) 224 x 168 mm<sup>2</sup>, number of slices = 240, voxel size 0.7 mm<sup>3</sup> isotropic, and scan time 8:08 minutes. Coronal oblique T2-weighted turbo spin echo (TE 59 msec, TR 6000 msec, FA 180°, FOV 200 x 168 mm<sup>2</sup>, in-plane voxel size 0.4 x 0.4 mm<sup>2</sup>, slice thickness 2 mm, number of slices = 60, time 6:50 minutes) and high-angular-resolved DWI (b 1200 mm<sup>2</sup>/sec, TE 67.6 msec, TR 7200 msec, voxel size 1.05 mm<sup>3</sup> isotropic, FA 180°, number of slices = 66, in-plane acceleration R = 3, reversed-phase encoding in anteroposterior and posteroanterior directions for paired acquisition in 64 directions, total acquisition time 18:38 minutes) sequences were prescribed. Dielectric pads and localized shimming methods were employed to reduce signal artifact</p> |

|                                   |                                                                                                                                                                                            |                                                                                                                                                                                                                                                                                                                                                                                                                                                                                                                                                                                                                                                                                                                                                                                                                                                                                                                                                                                                                                                                                                                                                                                                                                                                                             |
|-----------------------------------|--------------------------------------------------------------------------------------------------------------------------------------------------------------------------------------------|---------------------------------------------------------------------------------------------------------------------------------------------------------------------------------------------------------------------------------------------------------------------------------------------------------------------------------------------------------------------------------------------------------------------------------------------------------------------------------------------------------------------------------------------------------------------------------------------------------------------------------------------------------------------------------------------------------------------------------------------------------------------------------------------------------------------------------------------------------------------------------------------------------------------------------------------------------------------------------------------------------------------------------------------------------------------------------------------------------------------------------------------------------------------------------------------------------------------------------------------------------------------------------------------|
|                                   |                                                                                                                                                                                            | at the skull base.                                                                                                                                                                                                                                                                                                                                                                                                                                                                                                                                                                                                                                                                                                                                                                                                                                                                                                                                                                                                                                                                                                                                                                                                                                                                          |
| Patel et al. (2020) [20]          | To describe the initial experience using ultra-high field 7 Tesla (7T) MRI in patients with suspected Cushing's disease and negative or equivocal imaging at conventional field strengths. | Patients were scanned on a Siemens Terra 7 T system using a Nova Medical 1Tx/32Rx head coil. Pre- and post-contrast (0.2 mL/kg gadoterate meglumine) T1-weighted pituitary sequences included coronal and sagittal 2D TSE (TR = 960 ms, TE = 10 ms, voxel size = 0.2 × 0.2 × 2.0 mm), 3D SPACE (TR = 1200 ms, TE = 12 ms, variable flip angle, voxel size = 0.5 × 0.5 × 0.5 mm), and 3D MPRAGE (TR = 2300 ms, TE = 2.95 ms, flip angle = 7°, voxel size = 0.7 × 0.7 × 0.7 mm). Not all patients were scanned with all sequences due to changes in clinical protocol during the study period.                                                                                                                                                                                                                                                                                                                                                                                                                                                                                                                                                                                                                                                                                                |
| Rutland et al. (2021) [21]        | To examine 7T DWI as a novel method of measuring the consistency of pituitary adenomas.                                                                                                    | Participants were scanned using a 7T whole-body scanner. A SC72CD gradient coil was used (G <sub>max</sub> = 70 mT/m, maximum slew rate = 200 tesla/m/sec), with a single-channel transmit and 32-channel receive head coil. Scanning included a T1-weighted MP2RAGE sequence with the following parameters: TE 3.62 msec, TR 6000 msec, TI 1050 msec (2nd pulse 3000 msec), flip angle (FA) 5° (2nd pulse 4°), field of view (FOV) 224 × 168 mm <sup>2</sup> , number of slices = 240, voxel size 0.7 mm <sup>3</sup> isotropic, and scan time 8:08 minutes. Coronal oblique T2-weighted turbo spin echo (TE 59 msec, TR 6000 msec, FA 180°, FOV 200 × 168 mm <sup>2</sup> , in-plane voxel size 0.4 × 0.4 mm <sup>2</sup> , slice thickness 2 mm, number of slices = 60, time 6:50 minutes) and high-angular-resolved DWI (b 1200 mm <sup>2</sup> /sec, TE 67.6 msec, TR 7200 msec, voxel size 1.05 mm <sup>3</sup> isotropic, FA 180°, number of slices = 66, in-plane acceleration R = 3, reversed-phase encoding in anteroposterior and posteroanterior directions for paired acquisition in 64 directions, total acquisition time 18:38 minutes) sequences were prescribed. Dielectric pads and localized shimming methods were employed to reduce signal artifact at the skull base. |
| Rutland, Pawha et al. (2020) [22] | To determine the efficacy of 7T MRI in identifying radiological markers for endocrine function.                                                                                            | The Institutional Review Board-approved protocol employed a 7T whole-body MRI scanner (Magnetom, Siemens Healthcare, Erlangen, Germany) with a                                                                                                                                                                                                                                                                                                                                                                                                                                                                                                                                                                                                                                                                                                                                                                                                                                                                                                                                                                                                                                                                                                                                              |

|                     |                           |                                                                                                                                                                     |                                                                                                                                                                                                                                                                                                                                                                                                                                                                                                                                                                                                                                                                                                                                                                                                                                                                                                                                                                                                                                  |
|---------------------|---------------------------|---------------------------------------------------------------------------------------------------------------------------------------------------------------------|----------------------------------------------------------------------------------------------------------------------------------------------------------------------------------------------------------------------------------------------------------------------------------------------------------------------------------------------------------------------------------------------------------------------------------------------------------------------------------------------------------------------------------------------------------------------------------------------------------------------------------------------------------------------------------------------------------------------------------------------------------------------------------------------------------------------------------------------------------------------------------------------------------------------------------------------------------------------------------------------------------------------------------|
|                     |                           |                                                                                                                                                                     | <p>SC72CD gradient coil (Gmax=70 mT/m, max slew rate=200T/m/s), and used a single channel transmit and 32-channel receive head coil (Nova Medical, Wilmington, MA, USA). Sequences included a T1-weighted MP2RAGE[14] sequence: TE(ms)=3.62, TR(ms)=6000, TI(ms)=1050/3000, flip angle (FA)=5°/4°, field of view (FOV)=224×168-mm<sup>2</sup>, slices=240, resolution=0.7mm<sup>3</sup> isotropic, scan time=8:08mins. Quantitative T1-maps were derived from the MP2RAGE sequence. Coronal-oblique and axial T2-weighted turbo spin echo (T2-TSE) (TE=60ms, TR=6000ms, FA=180°, FOV=200×168mm<sup>2</sup>, in-plane resolution 0.4×0.4-mm<sup>2</sup>, slice thickness=2mm, slices=60, time=6:50mins) sequences were acquired. A T1-weighted MPRAGE sequence was also obtained (TE=4.1ms, TR=3000ms, TI=1050ms, FA=7°, resolution =0.7mm<sup>3</sup> isotropic, scan time (min)=7:40). All patients had a preoperative diagnostic MRI completed at clinical field strength (1.5T or 3T) using a routine pituitary protocol.</p> |
| Parkinson's disease | Shamir et al. (2019) [23] | To validate the clinical application accuracy of the 7T-ML method by comparing it with identification of the STN based on intraoperative microelectrode recordings. | MRI was acquired with a 3T Trio scanner. T1-weighted imaging parameters were as follows: repetition time = 1900 ms, echo time = 2.27 ms, 256 × 256 voxels per slice and voxel size 0.49 × 0.49 × 1 mm <sup>3</sup> . T2-weighted imaging parameters were as follows: repetition time = 3230 ms, echo time = 66 ms, 320 × 220 voxels per slice, and voxel size 0.375 × 0.375 × 2 mm <sup>3</sup>                                                                                                                                                                                                                                                                                                                                                                                                                                                                                                                                                                                                                                  |
|                     | Lau et al. (2017) [24]    | To integrate ultra-high field template data into the clinical workflow to assist with target selection in deep brain stimulation (DBS) surgical planning.           | Patients were scanned on a 7T imager (Agilent, Santa Clara, California, USA/Siemens, Erlangen, Germany) via a 24-channel transmit-receive head coil array constructed in-house with a receiver bandwidth of 50 kHz. A T1w magnetization-prepared rapid acquisition gradient-echo (MPRAGE) sequence was acquired (TR 1/4 8.1 milliseconds, TE 1/4 2.8 milliseconds, inversion time 1/4 650 milliseconds, flip angle 1/4 11, 256 512, 230 slices, resolution 1/4 0.59 0.43 0.75 mm <sup>3</sup> ). Then, a T2-weighted (T2w) turbo spin-echo 3D (TR 1/4 3D sagittal, matrix: 260                                                                                                                                                                                                                                                                                                                                                                                                                                                   |

|                         |                          |                                                                                                                                                               |                                                                                                                                                                                                                                                                                                                                                                                                                                                                                                                                                                                                                                                      |
|-------------------------|--------------------------|---------------------------------------------------------------------------------------------------------------------------------------------------------------|------------------------------------------------------------------------------------------------------------------------------------------------------------------------------------------------------------------------------------------------------------------------------------------------------------------------------------------------------------------------------------------------------------------------------------------------------------------------------------------------------------------------------------------------------------------------------------------------------------------------------------------------------|
|                         |                          |                                                                                                                                                               | 366, 266 slices, resolution 1/4 0.6 mm <sup>3</sup> , 4 averages) was acquired. High- resolution in vivo templates were created by performing group- wise linear and nonlinear registration of 12 normal subjects scanned on a human 7T imager with both T1w and T2w contrasts (available for download at <a href="http://www.nitrc.org/projects/deepbrain7t/">http://www.nitrc.org/projects/deepbrain7t/</a> ) resulting in an unbiased group nonlinear T1w average and T2w averages at submillimeter resolution.                                                                                                                                   |
|                         | La et al. (2019) [25]    | To measure hippocampal subfields in vivo using ultra-high field 7-Tesla and determine if these measures predict episodic memory impairment in PD during life. | Participants were scanned with a 7T GE Healthcare Discovery MR950 MRI whole-body scanner (GE Healthcare, Waukesha, WI) using a 32-channel radiofrequency receive head coil contained within a quadrature transmit coil (Nova Medical, Inc., Wilmington, MA). Sixteen oblique coronal images oriented perpendicular to the longitudinal axis of the hippocampus were acquired with a T2-weighted fast spin echo sequence: echo time 47 milliseconds; repetition time 5–8 s (cardiac gated); acquired voxel size was 0.22 × 0.22 × 1.5 mm <sup>3</sup> with a slice gap of 0.5 mm, interpolated by zero filling to 0.166 × 0.166 × 1.5 mm <sup>3</sup> |
| Cerebrovascular disease | Wrede et al. (2017) [26] | To prospectively evaluate non-contrast-enhanced 7-Tesla (T) MRA for delineation of unruptured intracranial aneurysms (UIAs)                                   | Both TOF MRA (Time-of-flight Magnetic Resonance Angiography) and non-contrast-enhanced MPRAGE (Magnetization-prepared rapid acquisition gradient echo) were used at 7T. 32-channel Tx/Rx radio-frequency (RF) head coil, maximum amplitude of 45 mT/m, slew rate of 200 mT/m/ms. Prior to acquisition of diagnostic sequences B0-shimming was performed using a vendor provided gradient echo sequence and algorithm. For B1-field mapping and local flip angle optimization a vendor-provided spin-echo type sequence was used; after a slice selective excitation, two refocusing pulses generate a spin-echo and a stimulated echo.               |
|                         | Uwano et al. (2017) [27] | To investigate whether OEF maps generated by magnetic resonance quantitative susceptibility mapping                                                           | A 7T-MRI scanner with quadrature transmission and 32-channel receive head coils was used. Source data of QSM were obtained using a 3-dimensional                                                                                                                                                                                                                                                                                                                                                                                                                                                                                                     |



|  |                               |                                                                                                                                                                                                                       |                                                                                                                                                                                                                                                                                                                                                                                                                                                                                                                                                                                                                                                                                                                                                                                                                                                                                                                                                                                                                                                                                                                                                               |
|--|-------------------------------|-----------------------------------------------------------------------------------------------------------------------------------------------------------------------------------------------------------------------|---------------------------------------------------------------------------------------------------------------------------------------------------------------------------------------------------------------------------------------------------------------------------------------------------------------------------------------------------------------------------------------------------------------------------------------------------------------------------------------------------------------------------------------------------------------------------------------------------------------------------------------------------------------------------------------------------------------------------------------------------------------------------------------------------------------------------------------------------------------------------------------------------------------------------------------------------------------------------------------------------------------------------------------------------------------------------------------------------------------------------------------------------------------|
|  |                               | (QSM) at 7 Tesla enabled detection of OEF changes when compared with those obtained with PET.                                                                                                                         | spoiled gradient recalled acquisition technique with the following scanning parameters: repetition time, 30 ms; echo time, 15 ms; flip angle, 20°; field of view, 256 mm; acquisition matrix size, 512×256; slice thickness, 2 mm; number of slices, 160; reconstruction voxel size after zero-fill interpolation, 0.5 mm <sup>3</sup> ; and scan time, 3 minutes 25 seconds. The sections were set in the orthogonal axial plane from the level of the superior cerebellar peduncle to high convexity. Magnitude as well as real/imaginary phase images were regenerated from this acquisition. Structural images including T2-weighted images and magnetic resonance angiography were also obtained.                                                                                                                                                                                                                                                                                                                                                                                                                                                        |
|  | Uwano et al. (2020) [28]      | To examine whether whole-brain magnetic resonance angiography (MRA) at 7T could non-invasively detect impaired CVR in patients with chronic cerebral ischemia by demonstrating the leptomeningeal collaterals (LMCs). | MRI examinations were performed with a 7T MRI scanner with a quadrature transmission and 32-channel receive head coil system. Whole-brain single-slab 3-dimensional(3D) time-of-flight MRA was performed using the following scanning parameters: repetition time, 12 ms; echo time, 2.8 ms; flip angle, 12°; field of view, 22 cm; matrix size, 512 × 384; slice thickness, 0.5 mm (zero-fill interpolation); partition, 332; tilted optimized non-saturated excitation; number of excitations, 1; and acquisition time, 10 min 32 s. Subsequently, axial and coronal maximum intensity projection images were generated after skull stripping with SPM8 software. SPECT studies were performed using two scanners and iodine 123 N-isopropyl-p-iodoamphetamine (123I-IMP) at a resting state with the ACZ challenge, as described previously. <sup>4,22</sup> The voxel size was 2.0 × 2.0 × 5.0 mm in scanner 1 and 1.72 × 1.72 × 1.72 mm in scanner 2. The cerebral blood flow (CBF) was quantified using the 123I-IMP autoradiography method. <sup>4</sup> Angiography and SPECT studies were performed within 10 days before/after the MRI examination. |
|  | Noureddine et al. (2019) [29] | To evaluate radiofrequency (RF)-induced tissue heating around aneurysm clips during a 7T head MR                                                                                                                      | Unspecified                                                                                                                                                                                                                                                                                                                                                                                                                                                                                                                                                                                                                                                                                                                                                                                                                                                                                                                                                                                                                                                                                                                                                   |

|  |                             |                                                                                                                                                                                                                                                                                                  |                                                                                                                                                                                                                                                                                                                                                                                                                                                                                                                                                                                                                                                                                                                                                                                                                                                                                                                                                                                                   |
|--|-----------------------------|--------------------------------------------------------------------------------------------------------------------------------------------------------------------------------------------------------------------------------------------------------------------------------------------------|---------------------------------------------------------------------------------------------------------------------------------------------------------------------------------------------------------------------------------------------------------------------------------------------------------------------------------------------------------------------------------------------------------------------------------------------------------------------------------------------------------------------------------------------------------------------------------------------------------------------------------------------------------------------------------------------------------------------------------------------------------------------------------------------------------------------------------------------------------------------------------------------------------------------------------------------------------------------------------------------------|
|  |                             | examination and determine the decoupling distance between multiple implanted clips.                                                                                                                                                                                                              |                                                                                                                                                                                                                                                                                                                                                                                                                                                                                                                                                                                                                                                                                                                                                                                                                                                                                                                                                                                                   |
|  | Millesi et al. (2019) [30]  | To delineate the wall of Intracranial Aneurysms to identify weak areas prone to rupture.                                                                                                                                                                                                         | Patients under- went ultra-high field MRI that was performed in a whole-body 7-T MRI unit (Siemens Healthcare) with a gradient strength of 40 mT/m using a 32-channel transmit/receive coil. The MRI sequence performed for this study was a nonenhanced magnetization-prepared rapid acquisition gradient echo (MPRAGE) sequence (TR/TE 3850/3.84 msec, isotropic voxel size 0.5 mm <sup>3</sup> ).                                                                                                                                                                                                                                                                                                                                                                                                                                                                                                                                                                                              |
|  | Koemans et al. (2021) [31]  | To investigate whether a striped occipital cortex and intragyral hemorrhage, two markers recently detected on ultra-high-field 7-tesla-magnetic resonance imaging in hereditary cerebral amyloid angiopathy (CAA), also occur in sporadic CAA (sCAA) or non-sCAA intracerebral hemorrhage (ICH). | T2*-weighted images were obtained. MRI markers associated with small vessel disease (SVD) were scored according to the Standards for Reporting Vascular changes on neuroimaging (STRIVE) criteria.                                                                                                                                                                                                                                                                                                                                                                                                                                                                                                                                                                                                                                                                                                                                                                                                |
|  | Damman n et al. (2017) [32] | To compare Cerebral Cavernous Malformations (CCMs)-associated cerebral venous angioarchitecture between sporadic and familial cases using 7T MRI.                                                                                                                                                | In all patients, SWI was performed at 7 T (Magnetom 7T; Siemens Healthcare). Susceptibility-weighted imaging sequences were established in previous work. <sup>5</sup> The whole-body ultra-high-field MR system was equipped with a single-channel transmitter/32-channel receiver head coil (Nova Medical), and a gradient system capable of 45 mT/m maximum amplitude and a slew rate of 220 mT/m/msec. The SWI parameters were as follows: TE 15 msec, TR 27 msec, flip angle (FA) 14°, in-plane resolution (R) 250 × 250 mm <sup>2</sup> , slice thickness (ST) 1.5 mm, and bandwidth 140 Hz/pixel. The SWI data were processed to phase, magnitude, susceptibility, and minimum intensity projection images. In addition, anatomical T1-weighted (TR 2500 msec, TE 1.4 msec, FA 6°, 0.7 mm isotropic), T2-weighted (TR 6000 msec, TE 99 msec, FA 29°, ST 3 mm, R 0.5 mm <sup>2</sup> ), and time-of-flight angiography (TR 20 msec, TE 4.3 msec, FA 20°, ST 0.4 mm, R 0.2 mm <sup>2</sup> ) |

|                      |                               |                                                                                                                                                                                   |                                                                                                                                                                                                                                                                                                                                                                                                                                                                                                                                                                                                                                                                                                                                                                                                                                                                                                                                                                                                                                                                                                                                        |
|----------------------|-------------------------------|-----------------------------------------------------------------------------------------------------------------------------------------------------------------------------------|----------------------------------------------------------------------------------------------------------------------------------------------------------------------------------------------------------------------------------------------------------------------------------------------------------------------------------------------------------------------------------------------------------------------------------------------------------------------------------------------------------------------------------------------------------------------------------------------------------------------------------------------------------------------------------------------------------------------------------------------------------------------------------------------------------------------------------------------------------------------------------------------------------------------------------------------------------------------------------------------------------------------------------------------------------------------------------------------------------------------------------------|
|                      |                               |                                                                                                                                                                                   | sequences were acquired.                                                                                                                                                                                                                                                                                                                                                                                                                                                                                                                                                                                                                                                                                                                                                                                                                                                                                                                                                                                                                                                                                                               |
|                      | Harteveld et al. (2017) [33]  | To compare 3-T and 7-T MRI in visualizing both the intracranial arterial vessel wall and vessel wall lesions.                                                                     | For 7-T MRI, a whole-body system (Philips Healthcare, Cleveland, OH, USA) was used with a 32-channel receive coil and volume transmit/receive coil for transmission (Nova Medical, Wilmington, MA, USA). The imaging protocol included a 3D whole-brain T1-weighted magnetisation-prepared inversion recovery turbo spin echo (MP-IR-TSE) intracranial vessel wall sequence                                                                                                                                                                                                                                                                                                                                                                                                                                                                                                                                                                                                                                                                                                                                                            |
|                      | Jolink et al. (2020) [34]     | To assess presence and extent of contrast agent leakage distant from the hematoma as a marker of BBB disruption in patients with spontaneous ICH.                                 | 7 T MRI (Philips, Best, The Netherlands) scans were acquired by a standardized protocol; 3D T2-weighted (repetition time (TR)/equivalent echo time (TE) 1/4 3158/ 60 ms; voxel size 1/4 acquired: 0.70 0.70 0.70 mm <sup>3</sup> , reconstructed: 0.35 0.35 0.35 mm <sup>3</sup> ), 3D T1-weighted (TR/TE 1/4 4.8/2.2 ms; voxel size 1/4 acquired: 1.00 1.01 1.00 mm <sup>3</sup> , reconstructed: 0.66 0.66 0.50 mm <sup>3</sup> ), dual echo 3D T2*-weighted (TR/first TE/ second TE 1/4 20/6.9/15.8 ms; voxel size 1/4 acquired: 0.50 0.50 0.70 mm <sup>3</sup> , reconstructed: 0.39 0.39 0.35 mm <sup>3</sup> ) and 3D FLAIR images were acquired (TR/ TE/inversion time (TI) 1/4 8000/300/2325 ms; voxel size 1/4 acquired: 0.80 0.82 0.80 mm <sup>3</sup> , reconstructed: 0.49 0.49 0.40 mm <sup>3</sup> ). A gadolinium-containing contrast agent was administered in a single intravenous injection of 0.1 mL Gadovist/kg body weight with a maximum of 10 mL Gadovist or 0.2 mL Dotarem/kg body weight with a maximum of 30 mL Dotarem. Postgadolinium FLAIR images were acquired at least 10 min after contrast injection. |
| Trigeminal neuralgia | Moon, Park et al. (2018) [35] | To determine the central causal mechanisms of TN and the surrounding brain structure in healthy controls and patients with TN using 7 Tesla (T) magnetic resonance imaging (MRI). | Subjects underwent MRI scans using a 7 T MR system (Philips Healthcare, Cleveland, OH, USA) with 32-channel phased-array head coil (Nova Medical, Wilmington, MA, USA). Three-dimensional (3D) anatomical brain scans were acquired using MP-RAGE (magnetization prepared rapid acquisition gradient echo) sequence-induced T1-weighted image with the following setting: repetition time (TR) = 4.6 ms, echo time (TE) = 2.3 ms, flip angle                                                                                                                                                                                                                                                                                                                                                                                                                                                                                                                                                                                                                                                                                           |

|                       |                              |                                                                                                                                                                                                                                                                                                   |                                                                                                                                                                                                                                                                                                                                                                                                                                                                                                                                                                                                                                                                                                                                                                                                                                               |
|-----------------------|------------------------------|---------------------------------------------------------------------------------------------------------------------------------------------------------------------------------------------------------------------------------------------------------------------------------------------------|-----------------------------------------------------------------------------------------------------------------------------------------------------------------------------------------------------------------------------------------------------------------------------------------------------------------------------------------------------------------------------------------------------------------------------------------------------------------------------------------------------------------------------------------------------------------------------------------------------------------------------------------------------------------------------------------------------------------------------------------------------------------------------------------------------------------------------------------------|
|                       |                              |                                                                                                                                                                                                                                                                                                   | (FA) = 110°, slice thickness = 0.5 mm, in-plane resolution = 0.5 × 0.5 mm <sup>2</sup> , matrix size = 488 × 396, number of axial slices = 320, and acquisition time (TA) = 5 min 53 s.                                                                                                                                                                                                                                                                                                                                                                                                                                                                                                                                                                                                                                                       |
|                       | Moon, You et al. (2018) [36] | To investigate DTI parameters and the feasibility of DTI criteria for diagnosing trigeminal neuralgia (TN).                                                                                                                                                                                       | Imaging scans were acquired with a whole-body 7.0 T MR system (Philips Healthcare, Cleveland, OH, USA) with a 16-channel receive head coil (Nova Medical, Wilmington, MA, USA) and volume transmit. Standard scanning protocols included T1, 3D T2-VISTA, and DTI were used to assess microstructure and pathology changes. MRI imaging sequencing was: 7.0 T T1 anatomical images (repetition time [TR] = 4.6 ms, echo time (TE) = 2.3 ms, flip angle (FA) = 110°, thickness = 0.5 mm, voxel size 0.5 × 0.5, matrix size 488 × 396); three-dimensional T2-VISTA images to confirm offending vessels (TR = 2031 ms, TE = 303 ms, FA = 90°, voxel size 0.5 × 0.5, matrix size 360 × 360); and DTI (TR = 5606 ms, TE = 63 ms, FA = 90°, thickness = 1.5 mm, voxel size 1.5 × 1.8, matrix size 140 × 107, and b-value = 700 s/mm <sup>2</sup> ). |
| Traumatic head injury | Hutter et al. (2020) [37]    | To evaluate the possible prognostic benefits of 7 T susceptibility weighted imaging (SWI) of traumatic cerebral microbleeds (TMBs) over 3 T SWI to predict the acute clinical state and subjective impairments, including health-related quality of life (HRQOL), after closed head injury (CHI). | The MRI examinations and their methods have been described in detail in an earlier publication. <sup>44</sup> The SWI 7 T acquisition time was about 13min. UHF MR examinations were performed on a 7 T whole-body research system (Magnetom 7T, Siemens Healthcare, Germany). Imaging at 3 T was performed on a clinical MR system (Magnetom Skyra, Siemens Healthcare, Germany). Both MR systems were used in combination with 32-channel radiofrequency head coils.                                                                                                                                                                                                                                                                                                                                                                        |
| Multiple sclerosis    | Chou et al. (2017) [38]      | To evaluate the sensitivity of 7T magnetization-transfer-weighted (MTw) images in the detection of white matter lesions compared with 3T-FLAIR                                                                                                                                                    | Participants underwent MRI in the Sir Peter Mansfield Imaging Centre (SPMIC) using a 7T Philips Achieva scanner (Philips Medical Systems, Best, the Netherlands). The scanning protocols included 3D T1-weighted magnetization-prepared rapid gradient-echo (MP-RAGE) imaging to assist with coregistering 3T-2D-FLAIR and 7T-3D-MTw images. Acquisition parameters at 7T were TE = 3.2 milliseconds; TR = 6.9 milliseconds; TI = 800 milliseconds; flip                                                                                                                                                                                                                                                                                                                                                                                      |

|                       |                                 |                                                                                                                                                                                                                                                                                                                                                                                                                                                                                                                                                                                           |                                                                                                                                                                                                                                                                                                                                                                                                                                                                                                                                                                                                                                                                                                                                                                                                                                                                                                   |
|-----------------------|---------------------------------|-------------------------------------------------------------------------------------------------------------------------------------------------------------------------------------------------------------------------------------------------------------------------------------------------------------------------------------------------------------------------------------------------------------------------------------------------------------------------------------------------------------------------------------------------------------------------------------------|---------------------------------------------------------------------------------------------------------------------------------------------------------------------------------------------------------------------------------------------------------------------------------------------------------------------------------------------------------------------------------------------------------------------------------------------------------------------------------------------------------------------------------------------------------------------------------------------------------------------------------------------------------------------------------------------------------------------------------------------------------------------------------------------------------------------------------------------------------------------------------------------------|
|                       |                                 |                                                                                                                                                                                                                                                                                                                                                                                                                                                                                                                                                                                           | angle of the TFE readout pulse = 8°; TFE factor = 240; shot-to-shot interval = 8 seconds; spatial resolution = 1.25 × 1.25 × 1.25 mm <sup>3</sup> ; field of view = 200 × 200 × 72.5 mm <sup>3</sup> ; reconstruction matrix = 160 × 160 × 58; and total acquisition time 2 minutes.                                                                                                                                                                                                                                                                                                                                                                                                                                                                                                                                                                                                              |
| Glioma                | Voormolen et al. (2019) [39]    | To investigate intra- and extracranial distortions in 7-T MRI scans of skull-base meningioma.                                                                                                                                                                                                                                                                                                                                                                                                                                                                                             | The 7-T scan parameters of the 3-dimensional sagittal magnetization-prepared turbo field echo sequence are as follows: field of view 256 256 200 mm <sup>3</sup> (matrix 256 256 200), inversion time 1200 ms, echo train length 256, readout repetition time 9 ms, TE 2.0 ms, bandwidth 506.3 Hz/pixel, and flip angle 8. Total imaging time: 9 minutes and 36 seconds. Prior to the acquisition at 7 T, a B0 field map was acquired.                                                                                                                                                                                                                                                                                                                                                                                                                                                            |
| Psychiatric disorders | Van den Boom et al. (2019) [40] | To investigate whether people can learn to dynamically control activity of the DLPFC, a region that has been shown to be important for working memory function and has been associated with various psychiatric disorders                                                                                                                                                                                                                                                                                                                                                                 | fMRI performed using a 7T Philips Achieva system, with a 32-channel headcoil. Functional data recorded using an EPI sequence (TR/TE: 2.0 s/25 ms, FA: 70, 39-axial slices, acquisition matrix 112 voxels × 112 voxels, slice thickness 2.2 mm no gap, 2.19 mm in plane resolution). A T1-weighted image was acquired for anatomy (TR/TE: 7/2.76ms; FA: 8; resolution 0.98 × 0.98 × 1.0mm).                                                                                                                                                                                                                                                                                                                                                                                                                                                                                                        |
|                       | Morris et al. (2019) [41]       | To use ultra-high field 7T MT MRI to localize the LC in humans with and without pathological anxiety, with 0.4 × 0.4 × 0.5 mm resolution in a feasible scan time. In addition, to apply a computational, data-driven LC localization and segmentation algorithm to delineate LC for all participants. The relationships between LC volume and trans-diagnostic measures of pathological anxiety and attentional control were subsequently examined in a dimensional approach based on the RDoC initiative, reflecting evidence that pathological anxiety is a trans-diagnostic construct. | Participants were scanned using a 7T MRI scanner (Magnetom, Siemens, Erlangen, Germany) with a 32-channel head coil at the Leon and Norma Hess Center for Science and Medicine, ISMMS. Most subjects tolerated the MRI environment well. On entering the scanner, several subjects reported dizziness lasting 1–2 min, which they found tolerable. Structural T1-weighted dual-inversion magnetization prepared gradient echo (MP2RAGE) anatomical images were acquired first (repetition time (TR)=4500 ms, TE=3.37 ms, TI1=1000s and 3200 ms, flip angle (FA)=4 and 5°, iPAT acceleration factor=3, bandwidth (BW) =130 Hz/pixel, 0.7 mm isotropic resolution, whole brain coverage). Secondly, MT-MRI data were acquired with a 3-D segmented gradient-recalled echo (GRE) readout (turbo-FLASH; TFL) preceded by a train of 20 MT pulses of amplitude with 190 V transmit, and 7 min run time |

**Acknowledgements:** (1) A continuously updated list of 7-T MRI facilities and their relevant locations globally can be accessed at

<https://www.google.com/maps/d/u/0/viewer?ll=1.941826124046989%2C0&z=2&mid=1dXG84OZIAOxjsqh3x2tGzWL1bNU>

(2) The second reviewer (or author) decided to not include his name in the list of authors.

## References

1. Arachchige A. S. P. M. (2023). Transitioning from PET/MR to trimodal neuroimaging: why not cover the temporal dimension with EEG?. *AIMS neuroscience*, *10*(1), 1–4. <https://doi.org/10.3934/Neuroscience.2023001>
2. Perera Molligoda Arachchige, A.S. Neuroimaging with PET/MR: moving beyond 3 T in preclinical systems, when for clinical practice?. *Clin Transl Imaging* **11**, 315–319 (2023). <https://doi.org/10.1007/s40336-023-00572-6>
3. Arachchige A. S. P. M. (2022). 7-Tesla PET/MRI: A promising tool for multimodal brain imaging?. *AIMS neuroscience*, *9*(4), 516–518. <https://doi.org/10.3934/Neuroscience.2022029>
4. Arosh S. Perera Molligoda Arachchige. A universal CAR-NK cell approach for HIV eradication[J]. *AIMS Allergy and Immunology*, 2021, *5*(3): 192-194. doi: [10.3934/Allergy.2021015](https://doi.org/10.3934/Allergy.2021015)
5. Cosottini, M., & Roccatagliata, L. (2021). Neuroimaging at 7 T: are we ready for clinical transition?. *European radiology experimental*, *5*(1), 37. <https://doi.org/10.1186/s41747-021-00234-0>
6. Okada, T., Fujimoto, K., Fushimi, Y., Akasaka, T., Thuy, D. H. D., Shima, A., Sawamoto, N., Oishi, N., Zhang, Z., Funaki, T., Nakamoto, Y., Murai, T., Miyamoto, S., Takahashi, R., & Isa, T. (2022). Neuroimaging at 7 Tesla: a pictorial narrative review. *Quantitative imaging in medicine and surgery*, *12*(6), 3406–3435. <https://doi.org/10.21037/qims-21-969>
7. Whiting, P. F., Rutjes, A. W., Westwood, M. E., Mallett, S., Deeks, J. J., Reitsma, J. B., Leeflang, M. M., Sterne, J. A., Bossuyt, P. M., & QUADAS-2 Group (2011). QUADAS-2: a revised tool for the quality assessment of diagnostic accuracy studies. *Annals of internal medicine*, *155*(8), 529–536. <https://doi.org/10.7326/0003-4819-155-8-201110180-00009>
8. Sterne, J. A. C., Savović, J., Page, M. J., Elbers, R. G., Blencowe, N. S., Boutron, I., Cates, C. J., Cheng, H. Y., Corbett, M. S., Eldridge, S. M., Emberson, J. R., Hernán, M. A., Hopewell, S., Hróbjartsson, A., Junqueira, D. R., Jüni, P., Kirkham, J. J., Lasserson, T., Li, T., McAleenan, A., ... Higgins, J. P. T. (2019). RoB 2: a revised tool for assessing risk of bias in randomised trials. *BMJ (Clinical research ed.)*, *366*, l4898. <https://doi.org/10.1136/bmj.l4898>

9. Page, M. J., McKenzie, J. E., Bossuyt, P. M., Boutron, I., Hoffmann, T. C., Mulrow, C. D., Shamseer, L., Tetzlaff, J. M., Akl, E. A., Brennan, S. E., Chou, R., Glanville, J., Grimshaw, J. M., Hróbjartsson, A., Lalu, M. M., Li, T., Loder, E. W., Mayo-Wilson, E., McDonald, S., McGuinness, L. A., ... Moher, D. (2021). The PRISMA 2020 statement: an updated guideline for reporting systematic reviews. *BMJ (Clinical research ed.)*, 372, n71. <https://doi.org/10.1136/bmj.n71>
10. Stefanits, H., Springer, E., Pataraiia, E., Baumgartner, C., Hainfellner, J. A., Prayer, D., Weisstanner, C., Czech, T., & Trattnig, S. (2017). Seven-Tesla MRI of Hippocampal Sclerosis: An In Vivo Feasibility Study With Histological Correlations. *Investigative radiology*, 52(11), 666–671. <https://doi.org/10.1097/RLI.0000000000000388>
11. Wang, I., Oh, S., Blümcke, I., Coras, R., Krishnan, B., Kim, S., McBride, A., Grinenko, O., Lin, Y., Overmyer, M., Aung, T. T., Lowe, M., Larvie, M., Alexopoulos, A. V., Bingham, W., Gonzalez-Martinez, J. A., Najm, I., & Jones, S. E. (2020). Value of 7T MRI and post-processing in patients with nonlesional 3T MRI undergoing epilepsy presurgical evaluation. *Epilepsia*, 61(11), 2509–2520. <https://doi.org/10.1111/epi.16682>
12. Rutland, J. W., Feldman, R. E., Delman, B. N., Panov, F., Fields, M. C., Marcuse, L. V., Hof, P. R., Lin, H. M., & Balchandani, P. (2018). Subfield-specific tractography of the hippocampus in epilepsy patients at 7 Tesla. *Seizure*, 62, 3–10. <https://doi.org/10.1016/j.seizure.2018.09.005>
13. Veersema, T. J., Ferrier, C. H., van Eijsden, P., Gosselaar, P. H., Aronica, E., Visser, F., Zwanenburg, J. M., de Kort, G. A. P., Hendrikse, J., Luijten, P. R., & Braun, K. P. J. (2017). Seven tesla MRI improves detection of focal cortical dysplasia in patients with refractory focal epilepsy. *Epilepsia open*, 2(2), 162–171. <https://doi.org/10.1002/epi4.12041>
14. Zhang, Y., Lv, Y., You, H., Dou, W., Hou, B., Shi, L., Zuo, Z., Mao, W., & Feng, F. (2019). Study of the hippocampal internal architecture in temporal lobe epilepsy using 7 T and 3 T MRI. *Seizure*, 71, 116–123. <https://doi.org/10.1016/j.seizure.2019.06.023>
15. Sharma, H. K., Feldman, R., Delman, B., Rutland, J., Marcuse, L. V., Fields, M. C., Ghatan, S., Panov, F., Singh, A., & Balchandani, P. (2021). Utility of 7 tesla MRI brain in 16 "MRI Negative" epilepsy patients and their surgical outcomes. *Epilepsy & behavior reports*, 15, 100424. <https://doi.org/10.1016/j.ebr.2020.100424>
16. van Lanen, R. H. G. J., Colon, A. J., Wiggins, C. J., Hoerberigs, M. C., Hoogland, G., Roebroek, A., Ivanov, D., Poser, B. A., Rouhl, R. P. W., Hofman, P. A. M., Jansen, J. F. A., Backes, W., Rijkers, K., & Schijns, O. E. M. G. (2021). Ultra-high field magnetic resonance imaging in human epilepsy: A systematic review. *NeuroImage. Clinical*, 30, 102602. <https://doi.org/10.1016/j.nicl.2021.102602>
17. Yao, A., Rutland, J. W., Verma, G., Banihashemi, A., Padormo, F., Tsankova, N. M., Delman, B. N., Shrivastava, R. K., & Balchandani, P. (2020). Pituitary adenoma consistency: Direct

- correlation of ultrahigh field 7T MRI with histopathological analysis. *European journal of radiology*, 126, 108931. <https://doi.org/10.1016/j.ejrad.2020.108931>
18. Rutland, J. W., Padormo, F., Yim, C. K., Yao, A., Arrighi-Allisan, A., Huang, K. H., Lin, H. M., Chelnis, J., Delman, B. N., Shrivastava, R. K., & Balchandani, P. (2019). Quantitative assessment of secondary white matter injury in the visual pathway by pituitary adenomas: a multimodal study at 7-Tesla MRI. *Journal of neurosurgery*, 132(2), 333–342. <https://doi.org/10.3171/2018.9.JNS182022>
  19. Rutland, J. W., Delman, B. N., Huang, K. H., Verma, G., Benson, N. C., Villavisanis, D. F., Lin, H. M., Bederson, J. B., Chelnis, J., Shrivastava, R. K., & Balchandani, P. (2019). Primary visual cortical thickness in correlation with visual field defects in patients with pituitary macroadenomas: a structural 7-Tesla retinotopic analysis. *Journal of neurosurgery*, 1–11. Advance online publication. <https://doi.org/10.3171/2019.7.JNS191712>
  20. Patel, V., Liu, C. J., Shiroishi, M. S., Hurth, K., Carmichael, J. D., Zada, G., & Toga, A. W. (2020). Ultra-high field magnetic resonance imaging for localization of corticotropin-secreting pituitary adenomas. *Neuroradiology*, 62(8), 1051–1054. <https://doi.org/10.1007/s00234-020-02431-x>
  21. Rutland, J. W., Loewenstern, J., Ranti, D., Tsankova, N. M., Bellaire, C. P., Bederson, J. B., Delman, B. N., Shrivastava, R. K., & Balchandani, P. (2020). Analysis of 7-tesla diffusion-weighted imaging in the prediction of pituitary macroadenoma consistency. *Journal of neurosurgery*, 134(3), 771–779. <https://doi.org/10.3171/2019.12.JNS192940>
  22. Rutland, J. W., Pawha, P., Belani, P., Delman, B. N., Gill, C. M., Brown, T., Cheesman, K., Shrivastava, R. K., & Balchandani, P. (2020). Tumor T2 signal intensity and stalk angulation correlates with endocrine status in pituitary adenoma patients: a quantitative 7 tesla MRI study. *Neuroradiology*, 62(4), 473–482. <https://doi.org/10.1007/s00234-019-02352-4>
  23. Shamir, R. R., Duchin, Y., Kim, J., Patriat, R., Marmor, O., Bergman, H., Vitek, J. L., Sapiro, G., Bick, A., Eliahou, R., Eitan, R., Israel, Z., & Harel, N. (2019). Microelectrode Recordings Validate the Clinical Visualization of Subthalamic-Nucleus Based on 7T Magnetic Resonance Imaging and Machine Learning for Deep Brain Stimulation Surgery. *Neurosurgery*, 84(3), 749–757. <https://doi.org/10.1093/neuros/nyy212>
  24. Lau, J. C., MacDougall, K. W., Arango, M. F., Peters, T. M., Parrent, A. G., & Khan, A. R. (2017). Ultra-High Field Template-Assisted Target Selection for Deep Brain Stimulation Surgery. *World neurosurgery*, 103, 531–537. <https://doi.org/10.1016/j.wneu.2017.04.043>
  25. La, C., Linortner, P., Bernstein, J. D., Ua Cruadhlaioich, M. A. I., Fenesy, M., Deutsch, G. K., Rutt, B. K., Tian, L., Wagner, A. D., Zeineh, M., Kerchner, G. A., & Poston, K. L. (2019). Hippocampal CA1 subfield predicts episodic memory impairment in Parkinson's disease. *NeuroImage. Clinical*, 23, 101824. <https://doi.org/10.1016/j.nicl.2019.101824>



26. Wrede, K. H., Matsushige, T., Goericke, S. L., Chen, B., Umutlu, L., Quick, H. H., Ladd, M. E., Johst, S., Forsting, M., Sure, U., & Schlamann, M. (2017). Non-enhanced magnetic resonance imaging of unruptured intracranial aneurysms at 7 Tesla: Comparison with digital subtraction angiography. *European radiology*, 27(1), 354–364.  
<https://doi.org/10.1007/s00330-016-4323-5>
27. Uwano, I., Kudo, K., Sato, R., Ogasawara, K., Kameda, H., Nomura, J. I., Mori, F., Yamashita, F., Ito, K., Yoshioka, K., & Sasaki, M. (2017). Noninvasive Assessment of Oxygen Extraction Fraction in Chronic Ischemia Using Quantitative Susceptibility Mapping at 7 Tesla. *Stroke*, 48(8), 2136–2141. <https://doi.org/10.1161/STROKEAHA.117.017166>
28. Uwano, I., Kameda, H., Harada, T., Kobayashi, M., Yanagihara, W., Setta, K., Ogasawara, K., Yoshioka, K., Yamashita, F., Mori, F., Matsuda, T., & Sasaki, M. (2020). Detection of impaired cerebrovascular reactivity in patients with chronic cerebral ischemia using whole-brain 7T MRA. *Journal of stroke and cerebrovascular diseases : the official journal of National Stroke Association*, 29(9), 105081.  
<https://doi.org/10.1016/j.jstrokecerebrovasdis.2020.105081>
29. Noureddine, Y., Kraff, O., Ladd, M. E., Wrede, K., Chen, B., Quick, H. H., Schaefer, G., & Bitz, A. K. (2019). Radiofrequency induced heating around aneurysm clips using a generic birdcage head coil at 7 Tesla under consideration of the minimum distance to decouple multiple aneurysm clips. *Magnetic resonance in medicine*, 82(5), 1859–1875.  
<https://doi.org/10.1002/mrm.27835>
30. Millesi, M., Knosp, E., Mach, G., Hainfellner, J. A., Ricken, G., Trattinig, S., & Gruber, A. (2019). Focal irregularities in 7-Tesla MRI of unruptured intracranial aneurysms as an indicator for areas of altered blood-flow parameters. *Neurosurgical focus*, 47(6), E7.  
<https://doi.org/10.3171/2019.9.FOCUS19489>
31. Koemans, E. A., Voigt, S., Rasing, I., Jolink, W., van Harten, T. W., van der Grond, J., van Rooden, S., Schreuder, F., Freeze, W. M., van Buchem, M. A., van Zwet, E. W., van Veluw, S. J., Terwindt, G. M., van Osch, M., Klijn, C., van Walderveen, M., & Wermer, M. (2021). Striped occipital cortex and intragyral hemorrhage: Novel magnetic resonance imaging markers for cerebral amyloid angiopathy. *International journal of stroke : official journal of the International Stroke Society*, 16(9), 1031–1038.  
<https://doi.org/10.1177/1747493021991961>
32. Dammann, P., Wrede, K., Zhu, Y., Matsushige, T., Maderwald, S., Umutlu, L., Quick, H. H., Hehr, U., Rath, M., Ladd, M. E., Felbor, U., & Sure, U. (2017). Correlation of the venous angioarchitecture of multiple cerebral cavernous malformations with familial or sporadic disease: a susceptibility-weighted imaging study with 7-Tesla MRI. *Journal of neurosurgery*, 126(2), 570–577. <https://doi.org/10.3171/2016.2.JNS152322>

33. Harteveld, A. A., van der Kolk, A. G., van der Worp, H. B., Dieleman, N., Siero, J. C. W., Kuijf, H. J., Frijns, C. J. M., Luijten, P. R., Zwanenburg, J. J. M., & Hendrikse, J. (2017). High-resolution intracranial vessel wall MRI in an elderly asymptomatic population: comparison of 3T and 7T. *European radiology*, 27(4), 1585–1595. <https://doi.org/10.1007/s00330-016-4483-3>
34. Jolink, W. M., Lindenholtz, A., van Etten, E. S., van Nieuwenhuizen, K. M., Schreuder, F. H., Kuijf, H. J., van Osch, M. J., Hendrikse, J., Rinkel, G. J., Wermer, M. J., & Klijn, C. J. (2020). Contrast leakage distant from the hematoma in patients with spontaneous ICH: A 7 T MRI study. *Journal of cerebral blood flow and metabolism : official journal of the International Society of Cerebral Blood Flow and Metabolism*, 40(5), 1002–1011. <https://doi.org/10.1177/0271678X19852876>
35. Moon, H. C., Park, C. A., Jeon, Y. J., You, S. T., Baek, H. M., Lee, Y. J., Cho, C. B., Cheong, C. J., & Park, Y. S. (2018). 7 Tesla magnetic resonance imaging of caudal anterior cingulate and posterior cingulate cortex atrophy in patients with trigeminal neuralgia. *Magnetic resonance imaging*, 51, 144–150. <https://doi.org/10.1016/j.mri.2018.05.005>
36. Moon, H. C., You, S. T., Baek, H. M., Jeon, Y. J., Park, C. A., Cheong, J. J., Lee, Y. J., & Park, Y. S. (2018). 7.0 Tesla MRI tractography in patients with trigeminal neuralgia. *Magnetic resonance imaging*, 54, 265–270. <https://doi.org/10.1016/j.mri.2017.12.033>
37. Hütter, B. O., Altmepfen, J., Kraff, O., Maderwald, S., Theysohn, J. M., Ringelstein, A., Wrede, K. H., Dammann, P., Quick, H. H., Schlamann, M., & Moeninghoff, C. (2020). Higher sensitivity for traumatic cerebral microbleeds at 7 T ultra-high field MRI: is it clinically significant for the acute state of the patients and later quality of life?. *Therapeutic advances in neurological disorders*, 13, 1756286420911295. <https://doi.org/10.1177/1756286420911295>
38. Chou, I. J., Lim, S. Y., Tanasescu, R., Al-Radaideh, A., Mouglin, O. E., Tench, C. R., Whitehouse, W. P., Gowland, P. A., & Constantinescu, C. S. (2018). Seven-Tesla Magnetization Transfer Imaging to Detect Multiple Sclerosis White Matter Lesions. *Journal of neuroimaging : official journal of the American Society of Neuroimaging*, 28(2), 183–190. <https://doi.org/10.1111/jon.12474>
39. Voormolen, E. H., Diederens, S. J. H., Woerdeman, P., van der Sprenkel, J. W. B., Noordmans, H. J., Visser, F., Viergever, M. A., Luijten, P., Hoogduin, H., & Robe, P. A. (2019). Implications of Extracranial Distortion in Ultra-High-Field Magnetic Resonance Imaging for Image-Guided Cranial Neurosurgery. *World neurosurgery*, 126, e250–e258. <https://doi.org/10.1016/j.wneu.2019.02.028>
40. Van den Boom, M. A., Jansma, J. M., & Ramsey, N. F. (2018). Rapid acquisition of dynamic control over DLPFC using real-time fMRI feedback. *European neuropsychopharmacology* :

- the journal of the European College of Neuropsychopharmacology, 28(11), 1194–1205.  
<https://doi.org/10.1016/j.euroneuro.2018.08.508>
41. Morris, L. S., Tan, A., Smith, D. A., Grehl, M., Han-Huang, K., Naidich, T. P., Charney, D. S., Balchandani, P., Kundu, P., & Murrugh, J. W. (2020). Sub-millimeter variation in human locus coeruleus is associated with dimensional measures of psychopathology: An in vivo ultra-high field 7-Tesla MRI study. *NeuroImage. Clinical*, 25, 102148.  
<https://doi.org/10.1016/j.nicl.2019.102148>
42. Solomon, O., Palnitkar, T., Patriat, R., Braun, H., Aman, J., Park, M. C., Vitek, J., Sapiro, G., & Harel, N. (2021). Deep-learning based fully automatic segmentation of the globus pallidus interna and externa using ultra-high 7 Tesla MRI. *Human brain mapping*, 42(9), 2862–2879.  
<https://doi.org/10.1002/hbm.25409>
43. Patriat, R., Cooper, S. E., Duchin, Y., Niederer, J., Lenglet, C., Aman, J., Park, M. C., Vitek, J. L., & Harel, N. (2018). Individualized tractography-based parcellation of the globus pallidus pars interna using 7T MRI in movement disorder patients prior to DBS surgery. *NeuroImage*, 178, 198–209. <https://doi.org/10.1016/j.neuroimage.2018.05.048>
44. Pascual-Diaz, S., Pineda, J., Serra, L., Varriano, F., & Prats-Galino, A. (2019). Default Mode Network structural alterations in Kocher-Monro trajectory white matter transection: A 3 and 7 tesla simulation modeling approach. *PloS one*, 14(11), e0224598.  
<https://doi.org/10.1371/journal.pone.0224598>
45. Lévy, S., Roche, P. H., Guye, M., & Callot, V. (2021). Feasibility of human spinal cord perfusion mapping using dynamic susceptibility contrast imaging at 7T: Preliminary results and identified guidelines. *Magnetic resonance in medicine*, 85(3), 1183–1194.  
<https://doi.org/10.1002/mrm.28559>
46. Kim, J. H., Son, Y. D., Kim, J. M., Kim, H. K., Kim, Y. B., Lee, C., & Oh, C. H. (2017). Interregional correlations of glucose metabolism between the basal ganglia and different cortical areas: an ultra-high resolution PET/MRI fusion study using 18F-FDG. *Brazilian journal of medical and biological research = Revista brasileira de pesquisas medicas e biologicas*, 51(1), e6724. <https://doi.org/10.1590/1414-431X20176724>
47. Alkemade, A., Mulder, M. J., Groot, J. M., Isaacs, B. R., van Berendonk, N., Lute, N., Isherwood, S. J., Bazin, P. L., & Forstmann, B. U. (2020). The Amsterdam Ultra-high field adult lifespan database (AHEAD): A freely available multimodal 7 Tesla submillimeter magnetic resonance imaging database. *NeuroImage*, 221, 117200.  
<https://doi.org/10.1016/j.neuroimage.2020.117200>
48. Choi, S. H., Kim, Y. B., Paek, S. H., & Cho, Z. H. (2019). Papez Circuit Observed by in vivo Human Brain With 7.0T MRI Super-Resolution Track Density Imaging and Track Tracing. *Frontiers in neuroanatomy*, 13, 17. <https://doi.org/10.3389/fnana.2019.00017>

49. García-Gomar, M. G., Strong, C., Toschi, N., Singh, K., Rosen, B. R., Wald, L. L., & Bianciardi, M. (2019). In vivo Probabilistic Structural Atlas of the Inferior and Superior Colliculi, Medial and Lateral Geniculate Nuclei and Superior Olivary Complex in Humans Based on 7 Tesla MRI. *Frontiers in neuroscience*, 13, 764.  
<https://doi.org/10.3389/fnins.2019.00764>
50. Grochowski, C., Krukow, P., Jonak, K., Stępniewski, A., Wawrzycki, K., & Maciejewski, R. (2019). The assessment of lenticulostriate arteries originating from middle cerebral artery using ultra high-field magnetic resonance time-of-flight angiography. *Journal of clinical neuroscience : official journal of the Neurosurgical Society of Australasia*, 68, 262–265.  
<https://doi.org/10.1016/j.jocn.2019.07.003>
51. Haast, R. A. M., Lau, J. C., Ivanov, D., Menon, R. S., Uludağ, K., & Khan, A. R. (2021). Effects of MP2RAGE B1+ sensitivity on inter-site T1 reproducibility and hippocampal morphometry at 7T. *NeuroImage*, 224, 117373.  
<https://doi.org/10.1016/j.neuroimage.2020.117373>
52. Isaacs, B. R., Mulder, M. J., Groot, J. M., van Berendonk, N., Lute, N., Bazin, P. L., Forstmann, B. U., & Alkemade, A. (2020). 3 versus 7 Tesla magnetic resonance imaging for parcellations of subcortical brain structures in clinical settings. *PloS one*, 15(11), e0236208.  
<https://doi.org/10.1371/journal.pone.0236208>
53. Rutland, J. W., Loewenstern, J., Ranti, D., Tsankova, N. M., Bellaire, C. P., Bederson, J. B., Delman, B. N., Shrivastava, R. K., & Balchandani, P. (2020). Analysis of 7-tesla diffusion-weighted imaging in the prediction of pituitary macroadenoma consistency. *Journal of neurosurgery*, 134(3), 771–779. <https://doi.org/10.3171/2019.12.JNS192940>
54. Paech, D., Windschuh, J., Oberhollenzer, J., Dreher, C., Sahm, F., Meissner, J. E., Goerke, S., Schuenke, P., Zaiss, M., Regnery, S., Bickelhaupt, S., Bäumer, P., Bendszus, M., Wick, W., Unterberg, A., Bachert, P., Ladd, M. E., Schlemmer, H. P., & Radbruch, A. (2018). Assessing the predictability of IDH mutation and MGMT methylation status in glioma patients using relaxation-compensated multipool CEST MRI at 7.0 T. *Neuro-oncology*, 20(12), 1661–1671.  
<https://doi.org/10.1093/neuonc/noy073>
55. Khlebnikov, V., Polders, D., Hendrikse, J., Robe, P. A., Voormolen, E. H., Luijten, P. R., Klomp, D. W., & Hoogduin, H. (2017). Amide proton transfer (APT) imaging of brain tumors at 7 T: The role of tissue water T1 -Relaxation properties. *Magnetic resonance in medicine*, 77(4), 1525–1532. <https://doi.org/10.1002/mrm.26232>
56. Grabner, G., Kiesel, B., Wöhrer, A., Millesi, M., Wurzer, A., Göd, S., Mallouhi, A., Knosp, E., Marosi, C., Trattnig, S., Wolfsberger, S., Preusser, M., & Widhalm, G. (2017). Local image variance of 7 Tesla SWI is a new technique for preoperative characterization of diffusely infiltrating gliomas: correlation with tumour grade and IDH1 mutational status. *European radiology*, 27(4), 1556–1567. <https://doi.org/10.1007/s00330-016-4451-y>

57. Neal, A., Moffat, B. A., Stein, J. M., Nanga, R. P. R., Desmond, P., Shinohara, R. T., Hariharan, H., Glarin, R., Drummond, K., Morokoff, A., Kwan, P., Reddy, R., O'Brien, T. J., & Davis, K. A. (2019). Glutamate weighted imaging contrast in gliomas with 7T magnetic resonance imaging. *NeuroImage. Clinical*, 22, 101694. <https://doi.org/10.1016/j.nicl.2019.101694>
58. Hangel, G., Cadrien, C., Lazen, P., Furtner, J., Lipka, A., Hečková, E., Hingerl, L., Motyka, S., Gruber, S., Strasser, B., Kiesel, B., Mischkulnig, M., Preusser, M., Roetzer, T., Wöhrer, A., Widhalm, G., Rössler, K., Trattinig, S., & Bogner, W. (2020). High-resolution metabolic imaging of high-grade gliomas using 7T-CRT-FID-MRSI. *NeuroImage. Clinical*, 28, 102433. <https://doi.org/10.1016/j.nicl.2020.102433>
59. Perera Molligoda Arachchige A. S. (2022). NK cell-based therapies for HIV infection: Investigating current advances and future possibilities. *Journal of leukocyte biology*, 111(4), 921–931. <https://doi.org/10.1002/JLB.5RU0821-412RR>
60. Perera Molligoda Arachchige, A.S., ChatGPT in nuclear medicine and radiology: reply to Laudicella et al.. *Clin Transl Imaging*, 2023, 11: 505–506. <https://doi.org/10.1007/s40336-023-00579-z>
61. Arachchige, A.S.P.M., Early applications of ChatGPT in medical practice, education and research. *Clinical medicine*, 2023, 23(4): 429–430. <https://doi.org/10.7861/clinmed.Let.23.4.2>
62. Perera Molligoda Arachchige, A.S. and Stomeo, N., Exploring the Opportunities and Challenges of ChatGPT in Academic Writing: Reply to Bom et al.. *Nuclear medicine and molecular imaging*, 2023, 57(5): 213–214. <https://doi.org/10.1007/s13139-023-00816-3>
63. Perera Molligoda Arachchige, A.S., New Horizons: The Potential Role of OpenAI's ChatGPT in Clinical Radiology. *Journal of the American College of Radiology*, 2023. <https://doi.org/10.1016/j.jacr.2023.06.028>
64. Perera Molligoda Arachchige, A.S. and Svet, A., Integrating artificial intelligence into radiology practice: undergraduate students' perspective. *European journal of nuclear medicine and molecular imaging*, 2021, 48: 4133–4135. <https://doi.org/10.1007/s00259-021-05558-y>
65. Perera Molligoda Arachchige, A.S., Large language models (LLM) and ChatGPT: a medical student perspective. *European journal of nuclear medicine and molecular imaging*, 2023, 50(8): 2248–2249. <https://doi.org/10.1007/s00259-023-06227-y>
66. Perera Molligoda Arachchige, A.S. and Stomeo, N., Controversies surrounding AI-based reporting systems in echocardiography. *Journal of echocardiography*, 2023, 1–2. <https://doi.org/10.1007/s12574-023-00620-0>
67. Perera Molligoda Arachchige A. S. (2022). NK cell-based therapies for HIV infection: Investigating current advances and future possibilities. *Journal of leukocyte biology*, 111(4), 921–931. <https://doi.org/10.1002/JLB.5RU0821-412RR>
